# **Loss of the extracellular matrix molecule tenascin-C leads to absence of reactive gliosis and promotes anti-inflammatory cytokine expression in an autoimmune glaucoma mouse model**

**Susanne Wiemann<sup>1</sup>, Jacqueline Reinhard<sup>1</sup>, Sabrina Reinehr<sup>2</sup>, Zülal Cibir<sup>1</sup>, Stephanie C. Joachim<sup>2##</sup>, Andreas Faissner<sup>1##</sup>**

<sup>1</sup>Department of Cell Morphology and Molecular Neurobiology, Faculty of Biology and Biotechnology, Ruhr University Bochum, Bochum, Germany

<sup>2</sup>Experimental Eye Research Institute, University Eye Hospital, Ruhr University Bochum, Bochum, Germany

# these authors contributed equally to this work

**\* Correspondence:**

Andreas Faissner

Andreas.Faissner@rub.de

Stephanie C. Joachim

Stephanie.Joachim@rub.de

**Keywords: autoimmune glaucoma model, extracellular matrix, microglia response, optic nerve demyelination, pro- and anti-inflammatory cytokines, reactive gliosis, retinal degeneration, tenascin-C**

Number of Figures: 9 (plus 1 Supplementary Figure)

Number of Tables: 4 (plus 4 Supplementary Tables)

Words Abstract: 350 (maximum 350 words)

Words Manuscript: 6844 (maximum 12.000 words)

## 1 **Abstract**

2 Previous studies demonstrated that retinal damage correlates with a massive remodeling of  
3 extracellular matrix (ECM) molecules and reactive gliosis. However, the functional significance  
4 of the ECM in retinal neurodegeneration is still unknown. In the present study, we used an  
5 intraocular pressure (IOP) independent experimental autoimmune glaucoma (EAG) mouse model  
6 to examine the role of the ECM glycoprotein tenascin-C (Tnc).

7 Wild type (WT ONA) and Tnc knockout (KO ONA) mice were immunized with an optic nerve  
8 antigen (ONA) homogenate and control groups (CO) obtained sodium chloride (WT CO, KO  
9 CO). IOP was measured weekly and electroretinographies were recorded at the end of the study.  
10 10 weeks after immunization, we analyzed retinal ganglion cells (RGCs), glial cells and the  
11 expression of different cytokines in retina and optic nerve tissue in all four groups.

12 IOP and retinal function was comparable in all groups. Although less severe in KO ONA, WT  
13 and KO mice displayed a significant loss of RGCs after immunization. Compared to KO ONA, a  
14 significant reduction of  $\beta$ III-tubulin stained axons and oligodendrocyte markers was noted in the  
15 optic nerve of WT ONA. In retinal and optic nerve slices, we found an enhanced GFAP<sup>+</sup> staining  
16 area of astrocytes in immunized WT. In retinal flat-mounts, a significantly higher number of  
17 Iba1<sup>+</sup> microglia was found in WT ONA, while a lower number of Iba1<sup>+</sup> cells was observed in KO  
18 ONA. Furthermore, an increased expression of the glial markers *Gfap*, *Iba1*, *Nos2* and *Cd68* was  
19 detected in retinal and optic nerve tissue of WT ONA, whereas comparable levels were observed  
20 in KO ONA post immunization. In addition, pro-inflammatory *Tnfa* expression was upregulated  
21 in WT ONA, but downregulated in KO ONA. Vice versa, a significantly increased anti-  
22 inflammatory *Tgfb* expression was measured in KO ONA animals.

23 Collectively, this study revealed that Tnc plays an important role in glial and inflammatory  
24 response during retinal neurodegeneration. Our results provide evidence that Tnc is involved in  
25 glaucomatous damage by regulating retinal glial activation and cytokine release. Thus, this  
26 transgenic EAG mouse model offers for the first time the possibility to investigate IOP-  
27 independent glaucomatous damage in direct relation to ECM remodeling.

## 28 1 Introduction

29 Glaucomatous neurodegeneration is characterized by a progressive loss of retinal ganglion cells  
30 (RGCs) and their axons, which form the optic nerve. The molecular mechanisms of RGC  
31 degeneration are not fully understood. In addition to increased intraocular pressure (IOP),  
32 immunological processes, glial activation, and remodeling of extracellular matrix (ECM)  
33 constituents are associated with glaucoma. In regard to the immune system, studies also indicate  
34 an alteration in serum antibodies against various retinal proteins in glaucoma patients with a  
35 normal IOP (Tezel et al., 1998; Wax et al., 2001; Wax, 2011). The connection between an  
36 immune response and glaucoma disease with the characteristic loss of RGCs was already  
37 demonstrated in an experimental autoimmune glaucoma (EAG) rat model. Here, glaucomatous  
38 damage was induced by immunization with ocular proteins (Lasparas et al., 2011; Joachim et al.,  
39 2013). Furthermore, a pathological upregulation of specific ECM components could be  
40 demonstrated in this model (Reinehr et al., 2016). However, the relationship between a change in  
41 ECM components and glaucoma pathogenesis is still unknown.

42 The ECM consists of several molecules, including proteoglycans and glycoproteins, and controls  
43 cellular key events such as adhesion, differentiation, migration, proliferation as well as survival  
44 (Hynes, 2009; Theocharidis et al., 2014; Faissner and Reinhard, 2015; Krishnaswamy et al., 2019;  
45 Roll and Faissner, 2019; Theocharis et al., 2019). ECM molecules can provide an inhibitory  
46 environment for neural regeneration and migration in the retina (Reinhard et al., 2015). A  
47 dramatic remodeling of ECM constituents has already been described after ischemia and  
48 glaucomatous damage (Reinhard et al., 2017a; Reinhard et al., 2017b). For instance, several  
49 studies reported a dysregulation of the glycoprotein tenascin-C (Tnc) during neurodegeneration.  
50 An upregulation of Tnc has been described in a glaucoma animal model (Johnson et al., 2007)  
51 and in patients with open-angle glaucoma (Pena et al., 1999). Tnc is also a key regulator of the  
52 immune system and plays an important role during neuroinflammation and glial response  
53 (Jakovcevski et al., 2013; Dzyubenko et al., 2018; Wiemann et al., 2019). In the retina, this  
54 glycoprotein is specifically expressed by amacrine and horizontal cells (D'Alessandri et al., 1995).  
55 Moreover, expression of Tnc by astrocytes is regulated via cytokines secreted by microglia  
56 (Smith and Hale, 1997; Haage et al., 2019). Microglia play an important role during  
57 neurodegenerative and neuroinflammatory processes (Glass et al., 2010). Their activation is  
58 characterized by an enhanced proliferation, migration, phagocytosis, and increased expression  
59 levels of neuroinflammatory molecules (Langmann, 2007; Wolf et al., 2017). The neurotoxic M1-  
60 subtype has an amoeboid morphology and releases pro-inflammatory signaling molecules, like  
61 tumor necrosis factor-alpha (TNF- $\alpha$ ) and inducible nitric oxide synthase (iNOS) (Harms et al.,  
62 2012; Varnum and Ikezu, 2012; Silverman and Wong, 2018). In contrast, the M2-phenotype is  
63 characterized by a morphology with ramified processes and the expression of anti-inflammatory  
64 cytokines such as the transforming growth factor-beta (TGF- $\beta$ ) (De Simone et al., 2004; Colton,  
65 2009; Ramirez et al., 2017).

66 In this study, we used a Tnc deficient EAG mouse model to further analyze the importance of Tnc  
67 during retinal neurodegeneration and neuroinflammatory outcomes in glaucoma disease. We  
68 immunized wild type (WT) and Tnc knockout (KO) mice with an optic nerve antigen homogenate  
69 (ONA) and examined retinal and optic nerve damage as well as macro- and microglial activity.  
70 Furthermore, we determined the expression pattern of pro- and anti-inflammatory cytokines. The  
71 present study was undertaken to address the role of Tnc in glaucomatous damage, retinal glial  
72 activation, myelination and inflammatory cytokine release.

73

## 74 **2 Materials and Methods**

### 75 **2.1 Animals**

76 Animals were housed under a 12 h light-dark cycle and had free access to chow and water. All  
77 procedures were approved by the animal care committee of North Rhine-Westphalia, Germany  
78 and performed according to the ARVO statement for the use of animals in ophthalmic and vision  
79 research. For the experiments, male and female 129/Sv WT and *Tnc* KO mice (Forsberg et al.,  
80 1996) were used at 6 weeks of age.

### 81 **2.2 Immunization**

82 WT (WT ONA) and KO (KO ONA) mice were immunized with ONA (1 mg/ml) mixed with  
83 incomplete Freund's adjuvants (FA) and 1 µg pertussis toxin (PTx; both Sigma Aldrich, St.  
84 Louis, MO, USA) according to the previously described pilot study (Reinehr et al., 2019). FA  
85 acted as an immunostimulatory and PTx was given to ensure the permeability of the blood retina  
86 barrier. PTx-application was repeated 2 days after immunization. Booster injections containing  
87 half of the initial dose were given 4 and 8 weeks after initial immunization. The control groups  
88 (WT CO; KO CO) were injected with 1 ml sodium chloride (B. Braun Melsungen AG,  
89 Melsungen, Germany), FA and PTx. 10 weeks after immunization, retinae and optic nerves were  
90 explanted for immunohistochemistry, quantitative real time PCR (RT-qPCR), and Western blot  
91 analyses. For RT-qPCR and Western blot, we pooled retinal and optic nerve tissue of both eyes.

### 92 **2.3 Intraocular pressure measurements**

93 IOP measurements were performed before immunization in WT and KO mice at 5 weeks of age  
94 with a rebound tonometer (TonoLab; Icare; Oy; Finland; n = 16/group) as previously described  
95 (Schmid et al., 2014; Reinhard et al., 2019). After immunization, IOP was measured weekly in all  
96 groups until the end of the study. Before IOP measurement mice were anesthetized with a  
97 ketamine/xylazine mixture (120/16 mg/kg). Both eyes were analyzed, and 10 readings of each eye  
98 were averaged (n = 8/group).

### 99 **2.4 Electroretinogram recordings**

100 Scotopic full-field flash electroretinograms (ERG) recordings (HM<sub>s</sub>ERG system, OcuScience,  
101 Henderson, NV, USA) were taken 10 weeks after immunization in all groups (n = 5/group) as  
102 previously described (Reinhard et al., 2019). Mice were dark-adapted and anaesthetized with a  
103 ketamine/xylazine mixture (120/16 mg/kg). Scotopic flash series with flash intensities at 0.1, 0.3,  
104 1.0, 3.0, 10.0, and 25.0 cd/m<sup>2</sup> were recorded. Electrical potentials were analyzed with the  
105 ERGView 4.380R software (OcuScience) using a 150 Hz filter before evaluating a- and b-wave  
106 amplitudes.

### 107 **2.5 Immunohistochemistry and confocal laser scanning microscopy**

108 Eyes and optic nerves were dissected and fixed in paraformaldehyde (PFA) for 1 day, dehydrated  
109 in sucrose (30 %), and embedded in Tissue-Tek freezing medium (Thermo Fisher Scientific,  
110 Cheshire, UK). Retinal cross-sections and optic nerve longitudinal sections (16 µm) were cut with  
111 a cryostat (CM3050 S, Leica) and transferred onto Superfrost plus object slides (Menzel-Glaeser,  
112 Braunschweig, Germany). First, slices were blocked with 1 % bovine serum albumin (BSA;  
113 Sigma-Aldrich), 3 % goat serum (Dianova, Hamburg, Germany), and 0.5 % Triton<sup>TM</sup>-X-100  
114 (Sigma-Aldrich) in phosphate-buffered saline (PBS) for 1 hour (h) at room temperature (RT).  
115 Afterwards, the primary antibodies were diluted in blocking solution and incubated overnight at  
116 RT (Table 1). Sections were washed 3 times in PBS and incubated for 2 h with adequate  
117 secondary antibody (Dianova, Hamburg, Germany; Table 1) solution without Triton<sup>TM</sup>-X-100.

118 Cell nuclei were detected with TO-PRO-3 (1:400; Thermo Fisher Scientific). The retinal and  
119 optic nerve slices were analyzed with a confocal laser-scanning microscope (LSM 510 META;  
120 Zeiss, Göttingen, Germany). 2 sections per slide, 4 images per retina (400x magnification) and 3  
121 images per optic nerve (200x magnification) were captured (n = 4-5/group). In addition, a 630x  
122 magnification was used for colocalization staining in optic nerve sections with antibodies against  
123 CC1 (coiled-coil 1) and Olig2 (oligodendrocyte transcription factor 2). Accordingly, 4 images  
124 were taken per slide (n = 5/group).

125 Laser lines and emission filters were adjusted using the Zeiss ZEN black software. Cropping of  
126 the images was done using Coral Paint Shop Pro X8 (Coral Corporation, CA, USA). Masked  
127 evaluation of the staining signal was performed with ImageJ software (ImageJ 1.51w, National  
128 Institutes of Health; Bethesda, MD, USA) as previously described (Reinehr et al., 2016; Reinehr  
129 et al., 2018). Images were converted into grey scales and the background was subtracted. Then,  
130 the lower and upper threshold values was determined for each image (Table 2). The percentage of  
131 the area fraction was measured using an ImageJ macro as previously described (Reinehr et al.,  
132 2018). This analysis was performed for immunohistochemical stainings against  $\beta$ III-tubulin, glial  
133 fibrillary acidic protein (GFAP) and myelin basic protein (MBP). Cell countings were done for  
134 immunopositive Brn3a<sup>+</sup> cells in retinal cross-sections and for Olig2<sup>+</sup>/CC1<sup>+</sup> cells in optic nerve  
135 slices. Values were transferred to Statistica software and the WT CO group was set to 100 %  
136 (V13.3; StatSoft (Europe), Hamburg, Germany).

## 137 **2.6 Quantification of RGCs und microglia in retinal flat-mounts**

138 Eyes were enucleated and fixed in 4 % PFA for 1 h at 4°C. The retinae were dissected from the  
139 eye and prepared as flat-mounts (n = 9/group). The tissue was fixed again in 4 % PFA for 5  
140 minutes and washed 3 times in PBS. Flat-mounts were blocked in 1 % BSA, 3 % donkey serum  
141 and 2 % Triton<sup>TM</sup>-X-100 in PBS for 1 h at RT. Next, incubation was performed with the RGC  
142 specific marker Brn3a (brain-specific homeobox/POU domain protein 3a) (Xiang et al., 1996;  
143 Nadal-Nicolas et al., 2009) and microglia marker Iba1 (ionized calcium-binding adapter molecule  
144 1) (Ito et al., 1998) for 2 days at 4°C. Following PBS washing (3 x 20 minutes), flat-mounts were  
145 incubated with secondary antibodies donkey anti-goat Cy3, donkey anti-rabbit Alexa Fluor 488  
146 and TO-PRO-3 (1:400) in blocking solution without Triton<sup>TM</sup>-X-100 for 2 h at RT. Microscopic  
147 images were captured using Axio Zoom.V16 (Zeiss, Göttingen, Germany). Flat-mounts were  
148 divided into 16 quadrants (200  $\mu$ m x 200  $\mu$ m) and Brn3a<sup>+</sup> and Iba1<sup>+</sup> cells were quantified. Groups  
149 were compared using one-way ANOVA followed by Tukey`s post hoc test. The WT CO group  
150 was set to 100 %.

## 151 **2.7 Western blotting**

152 Retinal tissue (n = 5/group) was homogenized in 150  $\mu$ l and optic nerve tissue (n = 5/group) in  
153 100  $\mu$ l lysis buffer (60 mM n-octyl- $\beta$ -D-glucopyranoside, 50 mM sodium acetate, 50 mM Tris  
154 chloride, pH 8.0 and 2 M urea) containing a protease inhibitor cocktail (Sigma-Aldrich) for 1 h on  
155 ice. Prior lysis, the optic nerve tissue was incubated in liquid nitrogen. Subsequently, all samples  
156 were centrifuged at 14.000 x g at 4°C for 30 minutes and the supernatant was used to determine  
157 the protein concentration. A BCA Protein Assay kit (Pierce, Thermo Fisher Scientific, Rockford,  
158 IL, USA) was used for retinal tissue. For optic nerves, the Qubit<sup>®</sup> Protein Assay kit (Life  
159 Technologies GmbH, Darmstadt, Germany) was used according to manufacturer`s instructions.  
160 4x SDS buffer was added to each protein sample (20  $\mu$ g) and denaturated for 5 minutes at 94°C.  
161 After separation via SDS-PAGE (10 % gels respectively 4–12 % polyacrylamide gradient gels),  
162 proteins were transferred to a polyvinylidene difluoride (PVDF) membrane (Roth, Karlsruhe,  
163 Germany) by Western blotting (1-2 h and 74 mA). Membranes were blocked (5 % w/v milk  
164 powder in TRIS-buffered saline (TBS) and Tween 20, TBST) at RT for 1 h and incubated with  
165 the primary antibody (Table 3) in blocking solution at 4°C overnight. Next day, membranes were

166 washed with TBST and incubated with horseradish peroxidase (HRP) coupled secondary  
167 antibodies (Table 3) in blocking solution at RT for 2 h. Excess antibody was washed off with  
168 TBST. ECL Substrate (Bio-Rad Laboratories GmbH, München, Germany) was used to develop  
169 the membrane (mixed 1:1 for 5 minutes). Finally, protein immunoreactivity was detected with a  
170 MicroChemi Chemiluminescence Reader (Biostep, Burkhardtsdorf, Germany). Band intensity  
171 was analyzed using ImageJ software and normalized to a corresponding reference protein ( $\beta$ -  
172 Actin/vinculin). The normalized values of the Western blot results were given in arbitrary units  
173 (a.u.).

## 174 **2.8 RNA isolation, cDNA synthesis, and RT-qPCR**

175 Retinae and optic nerves were explanted 10 weeks after immunization and stored at  $-80^{\circ}\text{C}$  until  
176 purification ( $n = 5/\text{group}$ ). The RNA isolation of the retina was carried out according to the  
177 manufacturer's introduction using the Gene Elute Mammalian Total RNA Miniprep Kit (Sigma-  
178 Aldrich, St. Louis, MO, USA). For total RNA isolation of optic nerve tissue, the ReliaPrep™  
179 RNA Tissue Miniprep System (Promega, Madison, WI, USA) was used. Prior isolation optic  
180 nerve tissue was incubated in liquid nitrogen. The concentration and purity of the isolated RNA  
181 was determined photometrically using the BioSpectrometer® (Eppendorf, Hamburg, Germany). 1  
182  $\mu\text{g}$  RNA and random hexamer primers were used for reverse transcription using the cDNA  
183 synthesis kit (Thermo Fisher Scientific, Waltham, MA, USA). RT-qPCR experiments were done  
184 with SYBR Green I in a Light Cycler 96® (Roche Applied Science, Mannheim, Germany). For  
185 each primer pair (Table 4) efficiencies were determined by a dilution series of 5, 25 and 125 ng  
186 cDNA. Expression in retina and optic nerve tissue was normalized against the housekeeping  
187 genes  $\beta$ -Actin (*Actb*) and *18S*, respectively.

## 188 **2.9 Statistical analysis**

189 Immunohistological, Western blot, IOP, and ERG data of control WT (WT CO) and KO (KO  
190 CO) as well as ONA-immunized WT (WT ONA) and KO (KO ONA) were analyzed by one-way  
191 ANOVA followed by Tukey's post hoc test using Statistica software (V13.3; StatSoft (Europe),  
192 Hamburg, Germany). Results of IOP measurements were presented as mean  $\pm$  standard error  
193 mean (SEM)  $\pm$  standard deviation (SD). ERG recordings, immunohistochemical, and Western  
194 blot data were shown as mean  $\pm$  SEM. For RT-qPCR results, groups were compared using the  
195 pairwise fixed reallocation and randomization test (REST© software) and were presented as  
196 median  $\pm$  quartile  $\pm$  minimum/maximum (Pfaffl et al., 2002).

197

## 198 **3 Results**

### 199 **3.1 No changes in IOP and retinal functionality in the EAG mouse model**

200 IOP measurements were performed before immunization in WT (WT CO) and KO (KO CO) at 5  
201 weeks of age (Figure 1A). After immunization, IOP was measured weekly in control and  
202 immunized WT (WT ONA) and KO (KO ONA) animals until the end of the study. At 5 weeks of  
203 age (-1), we observed no significant differences in the IOP of WT CO ( $9.8 \pm 0.2$  mmHg) and KO  
204 CO ( $9.7 \pm 0.1$  mmHg;  $p = 1.0$ ). Furthermore, no changes in the IOP were found in control and  
205 immunized groups throughout the study (Supplementary Table 1).

206 To determine possible retinal function deficits, induced by ONA-immunization, we performed  
207 ERG recordings of control and immunized WT and KO mice. Under scotopic conditions, a-wave  
208 responses arise from rod-photoreceptors, while b-waves represent the rod bipolar and Müllerglia  
209 cell response. In all four conditions no significant differences were observed between control and  
210 immunized WT and KO animals (Figure 1B, C; Supplementary Table 2). Therefore, we  
211 concluded that photoreceptor and bipolar cell function was not affected in this EAG mouse  
212 model.

### 213 **3.2 Significant loss of RGCs following immunization**

214 Previous studies of an EAG rat model showed a significant reduction of RGCs 4 weeks post  
215 immunization with ONA (Laspas et al., 2011; Noristani et al., 2016). Additionally, an  
216 upregulation of Tnc was found before significant loss of RGCs (Reinehr et al., 2016). Based on  
217 these findings, immunohistochemical stainings of RGCs were performed with an antibody against  
218 Brn3a, which specifically detects RGCs (Figure 2, Supplementary Table 3). The evaluation of  
219 RGCs in retinal cross-sections showed a significant reduction in the percentage of Brn3a<sup>+</sup> cells in  
220 WT ONA compared to WT CO as well as to KO CO (WT ONA:  $73.1 \pm 6.1$  % Brn3a<sup>+</sup> cells vs.  
221 WT CO:  $100.0 \pm 4.2$  % Brn3a<sup>+</sup> cells;  $p = 0.004$  and KO CO:  $92.2 \pm 3.9$  % Brn3a<sup>+</sup> cells,  $p = 0.04$ ,  
222 Figure 2A, B). Interestingly, no significant differences between control and immunized KO could  
223 be detected in horizontal cross-sections (KO CO:  $92.2 \pm 3.9$  % Brn3a<sup>+</sup> cells vs. KO ONA:  $83.7 \pm$   
224  $8.7$  % Brn3a<sup>+</sup> cells,  $p = 0.57$ , Figure 2A, B).

225 To further characterize the RGC population, we counted Brn3a<sup>+</sup> cells in retinal flat-mounts  
226 (Figure 2C). We determined the total amount (Figure 2D) as well as the number of Brn3a<sup>+</sup> cells  
227 within the central (Figure 2E) and peripheral (Figure 2F) area of the retina. A significant  
228 reduction in the total number was observed in immunized WT compared to both control  
229 genotypes (WT ONA:  $80.3 \pm 1.5$  % Brn3a<sup>+</sup> cells vs. WT CO:  $100.0 \pm 2.0$  % Brn3a<sup>+</sup> cells,  $p <$   
230  $0.001$ , KO CO:  $98.2 \pm 3.3$  % Brn3a<sup>+</sup> cells,  $p < 0.001$ ). Also, a significant loss of RGCs was  
231 detected in KO ONA mice ( $86.9 \pm 3.1$  % Brn3a<sup>+</sup> cells) compared to KO CO ( $p = 0.02$ ) and WT  
232 CO ( $p = 0.01$ ). A comparable percentage of Brn3a<sup>+</sup> cells was also observed in the central retina.  
233 So, immunized WT and KO animals showed a significant decline of RGCs compared to the  
234 corresponding control groups (WT ONA:  $82.7 \pm 1.7$  % Brn3a<sup>+</sup> cells vs. WT CO:  $100.0 \pm 2.5$  %  
235 Brn3a<sup>+</sup> cells,  $p < 0.001$  and KO ONA:  $86.3 \pm 3.7$  % Brn3a<sup>+</sup> cells vs. KO CO:  $97.8 \pm 2.9$  % Brn3a<sup>+</sup>  
236 cells,  $p = 0.03$ ). No significant differences were found between both immunized genotypes ( $p =$   
237  $0.80$ ). Furthermore, a decrease in the RGC density was verified in the peripheral area. Retinae of  
238 the WT ONA group ( $77.0 \pm 1.8$  % Brn3a<sup>+</sup> cells) displayed a loss of about 25 % RGCs compared  
239 to WT CO ( $100.0 \pm 1.7$  % Brn3a<sup>+</sup> cells,  $p < 0.001$ ). A significant reduction was also found in the  
240 comparison of KO CO and KO ONA (KO CO:  $99.0 \pm 4.1$  % Brn3a<sup>+</sup> cells vs. KO ONA:  $87.1 \pm$   
241  $2.8$  % Brn3a<sup>+</sup> cells,  $p = 0.02$ ). However, KO ONA showed a decrease of about 15 % in the  
242 peripheral part compared to WT CO group ( $p = 0.01$ ).

243 Collectively, we found a weaker RGC damage in immunized KO and the loss of RGCs was more  
244 prominent in the WT condition.

245

### 246 3.3 Optic nerve degeneration post ONA-immunization in WT mice

247 To analyze a possible degeneration of RGC axons, immunoreactivity of  $\beta$ III-tubulin was  
248 examined in optic nerve longitudinal sections of control and immunized WT and KO animals  
249 (Figure 3A). The immunopositive area of  $\beta$ III-tubulin was significantly reduced in immunized  
250 WT ( $30.85 \pm 8.55$  %  $\beta$ III-tubulin<sup>+</sup> area) compared to WT CO ( $100.00 \pm 18.35$  %  $\beta$ III-tubulin<sup>+</sup>  
251 area,  $p = 0.04$ , Figure 3B). Also, the  $\beta$ III-tubulin<sup>+</sup> area was decreased compared to both KO  
252 conditions (KO CO:  $93.66 \pm 19.18$  %  $\beta$ III-tubulin<sup>+</sup> area,  $p = 0.06$  and KO ONA:  $119.93 \pm$   
253  $13.48$  %  $\beta$ III-tubulin<sup>+</sup> area,  $p < 0.01$ ).

### 254 3.4 Extenuated macroglial reactivity after immunization in KO mice

255 Our results showed a decrease in the RGC number 10 weeks after immunization in WT and KO  
256 animals. Next, we investigated, if this glaucomatous neurodegeneration is associated with an  
257 altered macroglial response. Therefore, we analyzed the immunoreactivity of GFAP<sup>+</sup> astrocytes in  
258 retinal cross-sections. GFAP stained astrocytes were localized in the ganglion cell layer (GCL;  
259 Figure 4A). The GFAP<sup>+</sup> area was increased in WT ONA ( $167.22 \pm 18.61$  % GFAP<sup>+</sup> area)  
260 compared to the control groups (WT CO:  $100.00 \pm 9.28$  % GFAP<sup>+</sup> area,  $p < 0.05$  and KO CO:  
261  $105.81 \pm 4.54$  % GFAP<sup>+</sup> area,  $p = 0.02$ , Figure 4B). Interestingly, no changes in the GFAP signal  
262 were found in KO ONA ( $142.49 \pm 8.19$  % GFAP<sup>+</sup> area) compared to KO CO ( $p = 0.18$ ) as well as  
263 to WT CO ( $p = 0.11$ ). The statistical comparison of both immunized genotypes showed no  
264 significant differences ( $p = 0.46$ ).

265 Then, we evaluated GFAP protein levels via Western blot. For GFAP, a prominent band was  
266 detected at 50 kDa (Figure 4C). Relative quantification verified a significant increase in the  
267 GFAP protein concentration in WT after immunization (WT ONA:  $1.41 \pm 0.17$  a.u. vs. WT CO:  
268  $0.77 \pm 0.11$  a.u.,  $p = 0.03$  and KO CO:  $0.75 \pm 0.16$  a.u.,  $p = 0.03$ , Figure 4D). No changes were  
269 observed in the GFAP level of control and immunized KO animals (KO ONA:  $0.98 \pm 0.16$  a.u.,  $p$   
270  $= 0.66$ ).

271 We also analyzed the mRNA expression of *Gfap* in retinae via RT-qPCR (Figure 4E-G,  
272 Supplementary Table 4). Analysis revealed comparable levels of *Gfap* in KO CO and WT CO  
273 (1.4-fold,  $p = 0.11$ , Figure 4E). A significant increase of *Gfap* mRNA expression levels was  
274 observed in WT ONA (WT CO vs. WT ONA: 1.7-fold,  $p = 0.04$ , Figure 4F), whereas no  
275 differences could be detected in KO ONA (KO CO vs. KO ONA: 1.2-fold,  $p = 0.4$ , Figure 4F).  
276 The expression was comparable in both immunized genotypes (1.0-fold,  $p = 0.99$ , Figure 4G).

277 For GFAP, a thread-like staining pattern could be observed in optic nerve slices (Figure 5A). The  
278 evaluation of the GFAP immunoreactivity in optic nerve sections also showed no increased  
279 macroglial area in KO post immunization (KO ONA:  $134.30 \pm 23.57$  % GFAP area vs. KO CO:  
280  $147.18 \pm 31.27$  % GFAP<sup>+</sup> area,  $p = 0.98$  and WT CO:  $100.00 \pm 17.72$  % GFAP<sup>+</sup> area,  $p = 0.70$ ,  
281 Figure 5B). Moreover, a nearly doubled GFAP intensity was observed in WT ONA ( $196.70 \pm$   
282  $13.60$  % GFAP<sup>+</sup> area) compared to the corresponding control group ( $p = 0.04$ ).

283 Furthermore, protein levels of GFAP via Western blot analyses were comparable between all four  
284 groups (Figure 5C). However, the band intensity in WT ONA group was tendentially increased  
285 compared to the control group (WT ONA:  $1.50 \pm 0.25$  a.u. vs. WT CO:  $1.01 \pm 0.08$  a.u.,  $p = 0.24$ ,  
286 Figure 5D). Equal protein levels were found between control and ONA KO animals (KO CO:  
287  $1.11 \pm 0.22$  a.u. vs. KO ONA:  $0.82 \pm 0.08$  a.u.,  $p = 0.65$ ).

288 Finally, the RT-qPCR results of the optic nerve tissue showed no changes in *Gfap* expression  
289 between both control groups (WT CO vs. KO CO: 1.1-fold,  $p = 0.54$ , Figure 5E, Supplementary  
290 Table 4). In line with the immunohistochemical results, we found a slightly enhanced mRNA  
291 level in WT ONA (WT CO vs. WT ONA: 1.4-fold,  $p = 0.07$ , Figure 5F), whereas the KO ONA  
292 animals exhibited a reduction of *Gfap* expression (KO CO vs. KO ONA: 0.5-fold,  $p < 0.05$ ).  
293 Interestingly, in a direct comparison of the two immunized groups, *Gfap* expression was  
294 significantly reduced in KO animals (WT ONA vs. KO ONA: 0.4-fold,  $p = 0.02$ , Figure 5G).



295 In summary, we concluded that *Tnc* deficiency resulted in a diminished macroglial reaction  
296 during retinal and optic nerve degeneration in the EAG mouse model.

### 297 **3.5 Decreased demyelination after ONA-immunization in KO mice**

298 Our study demonstrates RGC degeneration in WT and KO animals after immunization.  
299 Furthermore, we noted that *Tnc* deficiency resulted in a diminished macroglial response. Finally,  
300 we analyzed the impact of ONA-immunization on oligodendroglia in optic nerve tissue. The  
301 oligodendrocytes appear in two different populations, as immature oligodendrocytes precursor  
302 cells (OPCs) and as myelinating, mature oligodendrocytes. To analyze both oligodendrocyte  
303 populations separately, an immunohistochemical colocalization staining was performed using the  
304 markers *Olig2* and *CC1*. *Olig2* is expressed by oligodendrocytes of all stages (Gautier et al.,  
305 2015). In contrast, *CC1* is only expressed by mature oligodendrocytes (Bin et al., 2016).  
306 Colocalization identified double positive cells as mature and single *Olig2*<sup>+</sup> cells as immature  
307 oligodendrocytes. In addition, we also investigated MBP on protein level via  
308 immunohistochemistry and Western blot. This protein is specifically expressed by myelinating  
309 oligodendrocytes (Pohl et al., 2011). Immunohistochemical stainings revealed fewer *Olig2*<sup>+</sup> cells  
310 in the WT ONA group compared to the other groups. Interestingly, there were more *Olig2*<sup>+</sup> cells  
311 in KO ONA than in WT ONA (Figure 6A).  $76.3 \pm 1.6$  % *Olig2*<sup>+</sup> cells were found in WT ONA,  
312 which indicates a significant oligodendrocyte loss over 25 % compared to control WT ( $100.0 \pm$   
313  $3.5$  % *Olig2*<sup>+</sup> cells,  $p < 0.001$ , Figure 6B). The number of *Olig2*<sup>+</sup> cells was also significantly  
314 decreased in WT ONA compared to KO CO ( $p = 0.04$ ). No differences were observed between  
315 both *Tnc* deficient groups (KO CO:  $90.2 \pm 2.4$  % *Olig2*<sup>+</sup> cells vs. KO ONA:  $95.2 \pm 4.9$  % *Olig2*<sup>+</sup>  
316 cells,  $p = 0.71$ ). Most interestingly, we verified significant differences between both immunized  
317 groups ( $p < 0.01$ ). The number of double-positive (*Olig2*<sup>+</sup>/*CC1*<sup>+</sup>) mature oligodendrocytes was  
318 clearly reduced in WT ONA compared to all other groups (Figure 6A). The statistical evaluation  
319 demonstrated only  $64.7 \pm 5.8$  % *Olig2*<sup>+</sup>/*CC1*<sup>+</sup> cells in WT ONA, whereas KO ONA exhibited  
320  $107.8 \pm 8.9$  % *Olig2*<sup>+</sup>/*CC1*<sup>+</sup> cells in optic nerve slices ( $p = 0.002$ , Figure 6C). Also, immunized  
321 WT showed a significant loss of mature oligodendrocytes compared to WT CO ( $100.0 \pm 8.3$  %  
322 *Olig2*<sup>+</sup>/*CC1*<sup>+</sup> cells,  $p = 0.01$ ) and KO CO ( $118.4 \pm 3.5$  % *Olig2*<sup>+</sup>/*CC1*<sup>+</sup> cells,  $p < 0.001$ ).

323 To consolidate the immunohistochemistry results, we analyzed the *Olig2* protein level in optic  
324 nerves by Western blot analyses (Figure 6D). For *Olig2*, we observed two bands at 32 kDa and 50  
325 kDa. A decrease of the band intensity was found in WT ONA ( $0.38 \pm 0.21$  a.u.) compared to the  
326 corresponding control group ( $0.89 \pm 0.35$  a.u.,  $p = 0.05$ , Figure 6E). Equal *Olig2* protein levels  
327 were observed in KO CO ( $0.77 \pm 0.21$  a.u.) and KO ONA ( $0.92 \pm 0.34$  a.u.,  $p = 0.82$ ).  
328 Interestingly, missing *Tnc* resulted in a significantly higher *Olig2* protein level post immunization  
329 compared to WT ( $p = 0.04$ ).

330 Finally, myelinating oligodendrocytes were detected with an antibody against MBP.  
331 Immunohistochemical staining revealed significantly reduced MBP immunoreactivity in WT  
332 ONA (Figure 7A). Statistical analyses showed a decreased MBP signal in WT ONA ( $46.22 \pm$   
333  $11.30$  % MBP<sup>+</sup> area) compared to WT CO ( $100.00 \pm 7.47$  % MBP<sup>+</sup> area,  $p = 0.001$ ), KO CO  
334 ( $88.76 \pm 4.93$  % MBP<sup>+</sup> area,  $p = 0.01$ ) and KO ONA ( $109.79 \pm 7.01$  % MBP<sup>+</sup> area  $p < 0.001$ ,  
335 Figure 7B).

336 MBP was examined on protein level via Western blot analyses and a prominent protein band was  
337 detected at 20 kDa (Figure 7C). Quantitative analyses revealed comparable MBP protein levels in  
338 control (WT CO:  $0.99 \pm 0.14$  a.u., KO CO:  $0.82 \pm 0.08$  a.u.) and ONA mice (WT ONA:  $0.89 \pm$   
339  $0.06$  a.u., KO ONA:  $0.82 \pm 0.08$  a.u., Figure 7D).

340 In conclusion, we found a significant decrease in mature as well as immature oligodendroglia in  
341 WT after immunization. Remarkably, immunized *Tnc* deficient mice showed no demyelination.

342  
343  
344

### 3.6 Decreased number of microglia and declined microglial response in KO ONA mice

Neurodegeneration is often accompanied by reactive microgliosis. In order to analyze the microglia population in the EAG mouse model and the effects of immunization, we performed immunohistochemical staining of retinal flat-mounts using an Iba1 antibody (Figure 8A, Supplementary Table 3). The number of Iba1<sup>+</sup> cells in the total as well as in the central and peripheral area of the retina was evaluated (Figure 8B-D). A significant increase in microglia numbers was detected in WT ONA ( $123.0 \pm 2.4$  % Iba1<sup>+</sup> cells) compared to control WT and KO in the total retina (WT CO:  $100.0 \pm 2.9$  % Iba1<sup>+</sup> cells,  $p < 0.001$  and vs. KO CO:  $102.3 \pm 5.7$  % Iba1<sup>+</sup> cells;  $p = 0.002$ , Figure 8B). No differences were found between both control groups ( $p = 0.97$ ). Remarkably, a significantly lower number of Iba1<sup>+</sup> cells was observed after immunization in KO ONA (KO ONA:  $84.5 \pm 2.7$  % Iba1<sup>+</sup> cells) compared to WT ONA ( $p < 0.001$ ), WT CO ( $p = 0.03$ ), and KO CO ( $p < 0.01$ ). Also, in the central part of the retina 20 % more Iba1<sup>+</sup> cells were detected in WT ONA ( $122.5 \pm 2.9$  % Iba1<sup>+</sup> cells) compared to the corresponding control group (WT CO:  $100.0 \pm 3.5$  % Iba1<sup>+</sup> cells,  $p < 0.01$ , Figure 8C). Immunized WT also showed significantly more microglial cells compared to control ( $p < 0.001$ ) and immunized KO mice ( $p < 0.001$ ). In KO CO, we counted  $98.1 \pm 5.8$  % Iba1<sup>+</sup> cells, whereas KO ONA only has  $84.0 \pm 2.9$  % Iba1<sup>+</sup> cells ( $p = 0.08$ ). A reduced microglia number was noted in KO ONA compared to WT CO ( $p = 0.04$ ). Equal numbers of microglial cells were seen in both control groups ( $p = 0.99$ ). Similarly, the number of microglia in WT ONA ( $123.6 \pm 3.4$  % Iba1<sup>+</sup> cells) was significantly enhanced compared to WT CO ( $100.0 \pm 3.2$  % Iba1<sup>+</sup> cells,  $p = 0.002$ , Figure 8D) and KO CO ( $107.2 \pm 6.4$  % Iba1<sup>+</sup> cells,  $p < 0.05$ ) in peripheral regions of the retinal. Also, the number of Iba1<sup>+</sup> cells was lower in KO ONA ( $85.1 \pm 3.1$  % Iba1<sup>+</sup> cells) compared to KO CO ( $p < 0.01$ ) and WT CO ( $p = 0.08$ ) in the periphery. Additionally, a significantly reduced microglial response was detected in immunized KO and WT animals ( $p < 0.001$ ). Regarding the quantification of Iba1<sup>+</sup> cells in the periphery, both control groups had similar cell counts ( $p = 0.63$ ).

In the next step, RT-qPCR was used to investigate whether microglia have reactive phenotypes. Beside *Iba1*, we also examined the markers *Nos2* and *Cd68* in retinal tissue (Figure 8E-G, Supplementary Table 4). No differences could be detected in the *Iba1* expression between control WT and KO mice (1.3-fold,  $p = 0.2$ , Figure 8E). However, KO CO mice showed significantly elevated levels of *Nos2* (1.7-fold;  $p = 0.013$ ) and *Cd68* (1.3-fold;  $p = 0.017$ ) compared to WT CO. The comparison of immunized and non-immunized WT showed a significantly increased expression of *Iba1* (1.5-fold,  $p = 0.048$ ) as well as of the reactive markers *Nos2* (1.4-fold,  $p = 0.021$ ) and *Cd68* (1.3-fold,  $p = 0.032$ , Figure 8F). Interestingly, comparable expression levels of these microglial markers were found in immunized KO and KO CO ( $p > 0.05$ , Figure 8F). RT-qPCR analyses revealed comparable mRNA levels in KO ONA compared to WT ONA ( $p > 0.05$ , Figure 8G).

In line with the RT-qPCR results of retinal tissue, we found a similar expression pattern of microglial markers in the optic nerve of control and immunized WT and KO mice (Supplementary Table 4 and Figure S1).

In summary, WT ONA animals showed a significantly increased microglia infiltration and glial marker expression, indicating an increased microglial response. Remarkably, a significantly reduced invasion and reactivity of microglia were observed in KO ONA, suggesting that *Tnc* signaling is an important modulator of microglia in glaucomatous neurodegeneration.

### 3.7 Altered expression pattern of pro- and anti-inflammatory cytokines in immunized WT compared to immunized KO animals

In our study, we noted a reactive gliosis and an increased microglial response after immunization in WT mice. Interestingly, these effects could not be detected in *Tnc* deficient animals.

Next, we analyzed the pro- and anti-inflammatory responses of the microglial phenotypes in retinae and optic nerves (Figure 9, Supplementary Table 4). Here, *Tnfa* was used to study M1 pro-inflammatory microglia, while *Tgfb* is expressed by M2 anti-inflammatory microglia. RT-qPCR

395 experiments revealed comparable mRNA level of *Tnfa* (1.4-fold,  $p = 0.132$ ) and *Tgfb* (1.4-fold,  $p$   
396  $= 0.071$ ) in KO CO mice compared to WT CO mice (Figure 9A). After ONA-immunization, *Tnfa*  
397 was significantly upregulated in WT and interestingly downregulated in KO compared to the  
398 corresponding control groups (WT CO vs. WT ONA: 1.7-fold,  $p = 0.026$  and KO CO vs. KO  
399 ONA: 0.4-fold,  $p = 0.031$ , Figure 9B). Statistical comparable *Tgfb* mRNA levels were found in  
400 WT CO and WT ONA (1.2-fold;  $p = 0.074$ ) as well as in KO CO and KO ONA (0.7-fold,  $p =$   
401  $0.07$ ; Figure 9B). The evaluation of both immunized genotypes showed a significant reduction of  
402 *Tnfa* (0.5-fold,  $p = 0.036$ ) and a significant increase of *Tgfb* (1.2-fold,  $p = 0.005$ ) after  
403 immunization in KO mice (Figure 9C).  
404 Finally, we examined, which microglial subtypes are altered due to an increased microglial  
405 reactivity in the optic nerve tissue of immunized and non-immunized WT and KO mice (Figure  
406 9D-F, Supplementary Table 4). Equal mRNA levels of *Tnfa* (1.4-fold,  $p = 0.07$ ) and *Tgfb* (0.9-  
407 fold,  $p = 0.659$ ) were seen in WT and KO controls (Figure 9D). A significant enhanced *Tnfa*  
408 expression (2.1-fold,  $p = 0.008$ ) and an unchanged *Tgfb* expression (0.9-fold,  $p = 0.71$ ) were  
409 detected in WT ONA compared to WT CO (Figure 9E). No changes of these markers were found  
410 in KO CO in comparison to KO ONA mice (*Tnfa*: 0.8-fold,  $p = 0.443$  and *Tgfb*: 0.9-fold,  $p =$   
411  $0.575$ ). In line with the RT-qPCR results of retinal tissue, we found a slightly reduced *Tnfa* (0.6-  
412 fold,  $p = 0.101$ ) and an unaltered *Tgfb* (0.8-fold,  $p = 0.297$ ) expression between both immunized  
413 groups (Figure 9F).  
414 In conclusion, missing *Tnc* resulted in a reduced mRNA level of pro-inflammatory *Tnfa*, but an  
415 enhanced expression of anti-inflammatory *Tgfb*. The increased expression of the pro-  
416 inflammatory cytokine in WT after immunization points towards an enhanced presence of  
417 reactive M1 microglia.

## 418 4 Discussion

419 Glaucoma involves progressive degeneration of RGCs and their axons leading to visual field loss  
420 (Tochel et al., 2005; Shon et al., 2014; McMonnies, 2017). Developing glaucoma is often  
421 associated with elevated IOP, but RGC damage can also occur without IOP changes. Previous  
422 studies showed evidence that an altered immune response is involved in glaucoma pathology  
423 (Wax et al., 1998; Tezel et al., 1999; Wax et al., 2001; Joachim et al., 2003; Grus et al., 2006). In  
424 addition, remodeling of ECM constituents was found in several retinal neurodegenerative  
425 diseases, including glaucoma (Hernandez et al., 1990; Hernandez, 1992; Pena et al., 1999;  
426 Johnson et al., 2007; Reinhard et al., 2017a).

427 In the glaucoma pathology the mechanisms are poorly understood, especially the relationship  
428 between RGC loss and the role of the immune system as well as ECM molecules. Based on these  
429 findings, we characterized glaucomatous damage associated with the absence of the ECM  
430 glycoprotein Tnc in an EAG mouse model for the first time. Here, we immunized WT and KO  
431 mice with an optic nerve homogenate to induce retinal damage and analyzed IOP, retinal  
432 functionality, RGC degeneration, glial activation and pro- and anti-inflammatory cytokine  
433 expression 10 weeks later.

434 Our analyses revealed that the IOP of WT and KO stayed in normal ranges. Previous studies of  
435 the EAG animal model also showed no alteration in the IOP (Noristani et al., 2016; Reinehr et al.,  
436 2019). Comparable IOP in control and immunized animals, points to the fact that the EAG model  
437 can be a suitable model for normal tension glaucoma.

438 Analyses of retinal functionality via ERG recordings showed no differences in a- and b-wave  
439 responses in control and immunized WT and KO mice, which indicates that outer photoreceptor  
440 cells as well as bipolar/Müller glia cells are not affected in the EAG model.

441 Next, it should be investigated whether there is a glaucoma-typical damage, namely RGC loss in  
442 WT and KO animals after ONA-immunization. Our results demonstrated a significant loss of  
443 Brn3a<sup>+</sup> RGCs in both genotypes following immunization. Interestingly, immunized KO mice  
444 displayed approximately 15 % more RGCs in retinal flat-mounts compared to immunized WT  
445 mice. Moreover, a comparable number of RGCs was found in retinal cross-sections of KO ONA.  
446 These findings indicate that Tnc deficiency leads to protection of RGCs in the EAG model. This  
447 is in line with our findings regarding optic nerve degeneration. Here, we verified a severe optic  
448 nerve damage by diminished  $\beta$ III tubulin staining in immunized WT, while no alterations were  
449 found in KO ONA. Glaucomatous neurodegeneration was also evident in a pilot study of the  
450 EAG mouse model. In this study, a decrease of RGCs and degeneration of optic nerve was  
451 detected 6 weeks after immunization with different ONA-doses (Reinehr et al., 2019).

452 In the EAG rat model an early upregulation of Tnc and its interaction partner  
453 RPTP $\beta$ / $\zeta$ /phosphacan was observed at 7 days, whereas a significant loss of RGCs could be  
454 detected 22 days after immunization (Joachim et al., 2014; Reinehr et al., 2016). These results  
455 suggest that Tnc may serve as an early indicator of retinal damage.

456 Studies reported that Tnc is a pro-inflammatory mediator, which is involved in the pathogenesis  
457 of CNS autoimmunity (Jakovcevski et al., 2013; Momcilovic et al., 2017; Wiemann et al., 2019).  
458 In addition, an enhanced reactivity of astrocytes in response to inflammatory signals is directly  
459 regulated by the ECM (Johnson et al., 2015). Furthermore, degeneration of RGCs is accompanied  
460 by reactive astrogliosis, which results in a higher GFAP expression (Senatorov et al., 2006; Inman  
461 and Horner, 2007; Johnson and Morrison, 2009; Noristani et al., 2016; Reinhard et al., 2019).  
462 Here, we detected an enhanced GFAP level in WT mice after immunization. However, the lack of  
463 Tnc resulted in the loss of a significant astrocytic response, which might depend on a missing Tnc  
464 mediated pro-inflammatory signaling.

465 In this study we noted a reduced population of mature oligodendrocytes and OPCs after  
466 immunization in WT mice. Also, a reduced MBP immunoreactivity demonstrated a  
467 demyelination of the optic nerve in the WT condition. Furthermore, no evidence of a decrease in  
468 oligodendroglia density and demyelination was detected after ONA-immunization in KO animals.

469 Interestingly, the fraction of mature Olig2/CC1 double immunopositive oligodendrocytes was  
470 significantly increased in the KO, in agreement with our earlier finding that Tnc inhibits the  
471 maturation of oligodendrocytes (Czopka et al., 2009; Czopka et al., 2010). In addition, a strong  
472 expression of Tnc in the optic nerve head inhibits the migration of oligodendrocytes from the  
473 optic nerve into the retina (Bartsch et al., 1994). Based on our results and the mentioned studies,  
474 we suggest that Tnc has an impact on demyelination processes. Missing of Tnc leads to no  
475 alteration in oligodendroglia but has a protective effect on myelination of optic nerve fibers in our  
476 autoimmune induced glaucoma mouse model.  
477 Neuroinflammatory changes in the retina occur during glaucomatous damage (Williams et al.,  
478 2017). Microglial activation is a very early event, often before significant loss of RGCs takes  
479 place (Ebnetter et al., 2010; Bosco et al., 2011; Ramirez et al., 2017). An enhanced microglial  
480 infiltration and marker expression revealed an increased glial response in WT post immunization  
481 in our study. Moreover, a significantly increased expression of the pro-inflammatory cytokine  
482 *Tnfa* implied a higher activity of M1-microglia. Previous studies showed that microglia switched  
483 to a M1-like phenotype, which can lead to neurotoxic effects by producing high levels of pro-  
484 inflammatory cytokines (Block et al., 2007; Varnum and Ikezu, 2012; Tang and Le, 2016). It is  
485 already known that Tnc supports the activity of M1-microglia (Claycomb et al., 2014; Wiemann  
486 et al., 2019). In primary microglia Tnc induced release of *Tnfa* and regulated the expression of  
487 *iNOS* via Toll-like receptor 4 signaling (Haage et al., 2019). In glaucoma, a glia-derived neuronal  
488 death was described through TNF- $\alpha$  (Tezel et al., 2001; Kitaoka et al., 2006; Nakazawa et al.,  
489 2006; Cueva Vargas et al., 2015). However, in an early phase after an optic nerve crush a  
490 protective effect of TNF- $\alpha$  was found in an experimental animal model (Mac Nair et al., 2014).  
491 In contrast, we found less invasion and reactivity of microglia in immunized KO mice and a  
492 significantly enhanced mRNA level of the anti-inflammatory *Tgfb*. Furthermore, the lack of Tnc  
493 leads to a significantly decreased expression of *Tnfa*. This result is consistent with the study by  
494 Piccinini, which demonstrated that the deletion of Tnc impaired TNF- $\alpha$  production (Piccinini and  
495 Midwood, 2012). TGF- $\beta$  inhibits pro-inflammatory cytokines and regulates proliferation and  
496 activity of microglial cells (Piras et al., 2012). Moreover, a missing TGF- $\beta$  signaling in microglia  
497 promotes retinal degeneration (Ma et al., 2019). Taken together, in our study an immunization  
498 induced increased microglia and inflammatory cytokine release, which was attenuated by the lack  
499 of Tnc. This finding strongly indicates that Tnc might be involved in glaucoma degeneration by  
500 regulating microglia reactivity and cytokine secretion.  
501 Collectively, the loss of Tnc resulted in a reduced RGC loss, diminished macro- and microglial  
502 responses, and a shift towards an enhanced anti-inflammatory at the expense of pro-inflammatory  
503 signaling. Our results showed that Tnc deficiency has multiple neuroprotective effects, suggesting  
504 that Tnc signaling plays an important role in glaucomatous neurodegeneration.

505

## 506 **5 Conclusion**

507 Our study demonstrated that Tnc influences glial response, migration, and reactivity during  
508 glaucomatous damage. This model is ideally suited for a better understanding of the molecular  
509 mechanisms between retinal neurodegeneration and ECM remodeling in order to develop future  
510 therapeutic options.

## 511 **6 Abbreviations**

512 Brn3a: brain-specific homeobox/POU domain protein 3a; CC1: coiled coil-1; Cd68: cluster of  
513 differentiation 68; EAG: experimental autoimmune glaucoma; ECM: extracellular matrix; ERG:  
514 electroretinogram; GCL: ganglion cell layer; GFAP: glial fibrillary acidic protein; Iba1: ionized  
515 calcium-binding adapter molecule 1; INL: inner nuclear layer; IOP: intraocular pressure; IPL:  
516 inner plexiform layer; KO: knockout; KO CO: control group tenascin-C knockout; KO ONA:  
517 immunized tenascin-C knockout; MBP: myelin basic protein; NFL: nerve fiber layer; Nos2: nitric  
518 oxide synthase 2; Olig2: oligodendrocyte transcription factor 2; ONA: optic nerve antigen; ONL:  
519 outer nuclear layer; OPC: oligodendrocytes precursor cell; OPL: outer plexiform layer; RGC:  
520 retinal ganglion cell; *Tgfb*/TGF- $\beta$ : transforming growth factor-beta; Tnc: tenascin-C; *Tnfa*/TNF-  
521  $\alpha$ : tumor necrosis factor-alpha; WT: wild type; WT CO: control group wild type; WT ONA:  
522 immunized wild type

## 523 **7 Acknowledgement**

524 The authors thank Stephanie Chun, Anja Coenen, Sabine Kindermann, Franziska Mennes,  
525 Annalena Pamp and Marion Voelzkow for excellent technical assistance.

## 526 **8 Funding**

527 A.F. received grant support from the German Research Foundation (DFG, FA-159/24-1), S.W.  
528 was supported by the Konrad-Adenauer-Foundation (200520593).

## 529 **9 Authors contribution**

530 SW performed experiments, analyzed data and wrote the manuscript. JR designed the study,  
531 analyzed data and revised the manuscript. SR and ZC performed experiments and analyzed data.  
532 SCJ and AF designed the study and revised the manuscript. All authors read and approved the  
533 final manuscript.

## 534 **10 Conflict of interest statement**

535 The authors declare that the research was conducted in the absence of any commercial or financial  
536 relationships that could be construed as a potential conflict of interest.

## 537 **11 Contribution to the field statement**

538 Glaucoma is a complex, multifactorial disease, where retinal ganglion cell loss, optic nerve  
539 degeneration, glial activation, neuroinflammation and extracellular matrix remodeling are linked  
540 to glaucomatous damage. Previous studies described an altered immune response in glaucoma  
541 pathology. In the present study, we used an intraocular pressure independent experimental  
542 autoimmune glaucoma model to analyze the effect of the extracellular matrix glycoprotein  
543 tenascin-C on retinal ganglion cells and glial activity in glaucoma. In wild type animals, we  
544 verified severe damage of retinal ganglion cells, demyelination and reactive astrogliosis.  
545 Autoimmune-induced glaucomatous damage was also associated to neuroinflammation,  
546 characterized by an enhanced microglia infiltration and expression of reactive glial markers. In  
547 contrast, the lack of tenascin-C resulted in a reduced retinal ganglion cells loss and ameliorated  
548 demyelination of the optic nerve. Remarkably, absence of tenascin-C led to a missing macro- and  
549 microglial response and anti-inflammatory cytokine expression. Collectively, our results indicate  
550 that tenascin-C plays a significant role in glial response and neuroinflammatory processes during  
551 glaucomatous degeneration. Thus, this transgenic experimental autoimmune glaucoma mouse  
552 model offers for the first time the possibility to investigate intraocular pressure independent  
553 glaucomatous damage in direct relation to extracellular matrix remodeling.

## 554 12 References

- 555 Bartsch, U., Faissner, A., Trotter, J., Dorries, U., Bartsch, S., Mohajeri, H., and Schachner, M.  
556 (1994). Tenascin demarcates the boundary between the myelinated and nonmyelinated  
557 part of retinal ganglion cell axons in the developing and adult mouse. *J Neurosci* 14,  
558 4756-4768.
- 559 Bin, J.M., Harris, S.N., and Kennedy, T.E. (2016). The oligodendrocyte-specific antibody 'CC1'  
560 binds Quaking 7. *J Neurochem* 139, 181-186.
- 561 Block, M.L., Zecca, L., and Hong, J.S. (2007). Microglia-mediated neurotoxicity: uncovering the  
562 molecular mechanisms. *Nat Rev Neurosci* 8, 57-69.
- 563 Bosco, A., Steele, M.R., and Vetter, M.L. (2011). Early microglia activation in a mouse model of  
564 chronic glaucoma. *J Comp Neurol* 519, 599-620.
- 565 Claycomb, K.I., Winokur, P.N., Johnson, K.M., Nicaise, A.M., Giampetruzzi, A.W., Sacino,  
566 A.V., Snyder, E.Y., Barbarese, E., Bongarzone, E.R., and Crocker, S.J. (2014). Aberrant  
567 production of tenascin-C in globoid cell leukodystrophy alters psychosine-induced  
568 microglial functions. *J Neuropathol Exp Neurol* 73, 964-974.
- 569 Colton, C.A. (2009). Heterogeneity of microglial activation in the innate immune response in the  
570 brain. *J Neuroimmune Pharmacol* 4, 399-418.
- 571 Cueva Vargas, J.L., Osswald, I.K., Unsain, N., Arousseau, M.R., Barker, P.A., Bowie, D., and  
572 Di Polo, A. (2015). Soluble Tumor Necrosis Factor Alpha Promotes Retinal Ganglion Cell  
573 Death in Glaucoma via Calcium-Permeable AMPA Receptor Activation. *J Neurosci* 35,  
574 12088-12102.
- 575 Czopka, T., Von Holst, A., Ffrench-Constant, C., and Faissner, A. (2010). Regulatory  
576 mechanisms that mediate tenascin C-dependent inhibition of oligodendrocyte precursor  
577 differentiation. *J Neurosci* 30, 12310-12322.
- 578 Czopka, T., Von Holst, A., Schmidt, G., Ffrench-Constant, C., and Faissner, A. (2009). Tenascin  
579 C and tenascin R similarly prevent the formation of myelin membranes in a RhoA-  
580 dependent manner, but antagonistically regulate the expression of myelin basic protein via  
581 a separate pathway. *Glia* 57, 1790-1801.
- 582 D'alessandri, L., Ranscht, B., Winterhalter, K.H., and Vaughan, L. (1995). Contactin/F11 and  
583 tenascin-C co-expression in the chick retina correlates with formation of the synaptic  
584 plexiform layers. *Curr Eye Res* 14, 911-926.
- 585 De Simone, R., Ajmone-Cat, M.A., and Minghetti, L. (2004). Atypical antiinflammatory  
586 activation of microglia induced by apoptotic neurons: possible role of phosphatidylserine-  
587 phosphatidylserine receptor interaction. *Mol Neurobiol* 29, 197-212.
- 588 Dzyubenko, E., Manrique-Castano, D., Kleinschnitz, C., Faissner, A., and Hermann, D.M.  
589 (2018). Role of immune responses for extracellular matrix remodeling in the ischemic  
590 brain. *Ther Adv Neurol Disord* 11, 1756286418818092.
- 591 Ebnetter, A., Casson, R.J., Wood, J.P., and Chidlow, G. (2010). Microglial activation in the visual  
592 pathway in experimental glaucoma: spatiotemporal characterization and correlation with  
593 axonal injury. *Invest Ophthalmol Vis Sci* 51, 6448-6460.
- 594 Faissner, A., and Reinhard, J. (2015). The extracellular matrix compartment of neural stem and  
595 glial progenitor cells. *Glia* 63, 1330-1349.
- 596 Forsberg, E., Hirsch, E., Frohlich, L., Meyer, M., Ekblom, P., Aszodi, A., Werner, S., and Fassler,  
597 R. (1996). Skin wounds and severed nerves heal normally in mice lacking tenascin-C.  
598 *Proc Natl Acad Sci U S A* 93, 6594-6599.
- 599 Gautier, H.O., Evans, K.A., Volbracht, K., James, R., Sitnikov, S., Lundgaard, I., James, F., Lao-  
600 Peregrin, C., Reynolds, R., Franklin, R.J., and Karadottir, R.T. (2015). Neuronal activity  
601 regulates remyelination via glutamate signalling to oligodendrocyte progenitors. *Nat*  
602 *Commun* 6, 8518.
- 603 Glass, C.K., Saijo, K., Winner, B., Marchetto, M.C., and Gage, F.H. (2010). Mechanisms  
604 underlying inflammation in neurodegeneration. *Cell* 140, 918-934.

- 605 Grus, F.H., Joachim, S.C., Bruns, K., Lackner, K.J., Pfeiffer, N., and Wax, M.B. (2006). Serum  
606 autoantibodies to alpha-fodrin are present in glaucoma patients from Germany and the  
607 United States. *Invest Ophthalmol Vis Sci* 47, 968-976.
- 608 Haage, V., Elmadany, N., Roll, L., Faissner, A., Gutmann, D.H., Semtner, M., and Kettenmann,  
609 H. (2019). Tenascin C regulates multiple microglial functions involving TLR4 signaling  
610 and HDAC1. *Brain Behav Immun.*
- 611 Harms, A.S., Lee, J.K., Nguyen, T.A., Chang, J., Ruhn, K.M., Trevino, I., and Tansey, M.G.  
612 (2012). Regulation of microglia effector functions by tumor necrosis factor signaling. *Glia*  
613 60, 189-202.
- 614 Hernandez, M.R. (1992). Ultrastructural immunocytochemical analysis of elastin in the human  
615 lamina cribrosa. Changes in elastic fibers in primary open-angle glaucoma. *Invest*  
616 *Ophthalmol Vis Sci* 33, 2891-2903.
- 617 Hernandez, M.R., Andrzejewska, W.M., and Neufeld, A.H. (1990). Changes in the extracellular  
618 matrix of the human optic nerve head in primary open-angle glaucoma. *Am J Ophthalmol*  
619 109, 180-188.
- 620 Hynes, R.O. (2009). The extracellular matrix: not just pretty fibrils. *Science* 326, 1216-1219.
- 621 Inman, D.M., and Horner, P.J. (2007). Reactive nonproliferative gliosis predominates in a chronic  
622 mouse model of glaucoma. *Glia* 55, 942-953.
- 623 Ito, D., Imai, Y., Ohsawa, K., Nakajima, K., Fukuuchi, Y., and Kohsaka, S. (1998). Microglia-  
624 specific localisation of a novel calcium binding protein, Iba1. *Brain Res Mol Brain Res*  
625 57, 1-9.
- 626 Jakovcevski, I., Miljkovic, D., Schachner, M., and Andjus, P.R. (2013). Tenascins and  
627 inflammation in disorders of the nervous system. *Amino Acids* 44, 1115-1127.
- 628 Joachim, S.C., Grus, F.H., and Pfeiffer, N. (2003). Analysis of autoantibody repertoires in sera of  
629 patients with glaucoma. *Eur J Ophthalmol* 13, 752-758.
- 630 Joachim, S.C., Mondon, C., Gramlich, O.W., Grus, F.H., and Dick, H.B. (2014). Apoptotic retinal  
631 ganglion cell death in an autoimmune glaucoma model is accompanied by antibody  
632 depositions. *J Mol Neurosci* 52, 216-224.
- 633 Joachim, S.C., Reinehr, S., Kuehn, S., Laspas, P., Gramlich, O.W., Kuehn, M., Tischoff, I., Von  
634 Pein, H.D., Dick, H.B., and Grus, F.H. (2013). Immune response against ocular tissues  
635 after immunization with optic nerve antigens in a model of autoimmune glaucoma. *Mol*  
636 *Vis* 19, 1804-1814.
- 637 Johnson, E.C., Jia, L., Cepurna, W.O., Doser, T.A., and Morrison, J.C. (2007). Global changes in  
638 optic nerve head gene expression after exposure to elevated intraocular pressure in a rat  
639 glaucoma model. *Invest Ophthalmol Vis Sci* 48, 3161-3177.
- 640 Johnson, E.C., and Morrison, J.C. (2009). Friend or foe? Resolving the impact of glial responses  
641 in glaucoma. *J Glaucoma* 18, 341-353.
- 642 Johnson, K.M., Milner, R., and Crocker, S.J. (2015). Extracellular matrix composition determines  
643 astrocyte responses to mechanical and inflammatory stimuli. *Neurosci Lett* 600, 104-109.
- 644 Kitaoka, Y., Kitaoka, Y., Kwong, J.M., Ross-Cisneros, F.N., Wang, J., Tsai, R.K., Sadun, A.A.,  
645 and Lam, T.T. (2006). TNF-alpha-induced optic nerve degeneration and nuclear factor-  
646 kappaB p65. *Invest Ophthalmol Vis Sci* 47, 1448-1457.
- 647 Krishnaswamy, V.R., Benbenishty, A., Blinder, P., and Sagi, I. (2019). Demystifying the  
648 extracellular matrix and its proteolytic remodeling in the brain: structural and functional  
649 insights. *Cell Mol Life Sci* 76, 3229-3248.
- 650 Langmann, T. (2007). Microglia activation in retinal degeneration. *J Leukoc Biol* 81, 1345-1351.
- 651 Laspas, P., Gramlich, O.W., Muller, H.D., Cuny, C.S., Gottschling, P.F., Pfeiffer, N., Dick, H.B.,  
652 Joachim, S.C., and Grus, F.H. (2011). Autoreactive antibodies and loss of retinal ganglion  
653 cells in rats induced by immunization with ocular antigens. *Invest Ophthalmol Vis Sci* 52,  
654 8835-8848.



- 655 Ma, W., Silverman, S.M., Zhao, L., Villasmil, R., Campos, M.M., Amaral, J., and Wong, W.T.  
656 (2019). Absence of TGFbeta signaling in retinal microglia induces retinal degeneration  
657 and exacerbates choroidal neovascularization. *Elife* 8.
- 658 Mac Nair, C.E., Fernandes, K.A., Schlamp, C.L., Libby, R.T., and Nickells, R.W. (2014). Tumor  
659 necrosis factor alpha has an early protective effect on retinal ganglion cells after optic  
660 nerve crush. *J Neuroinflammation* 11, 194.
- 661 Mcmonnies, C.W. (2017). Glaucoma history and risk factors. *J Optom* 10, 71-78.
- 662 Momcilovic, M., Stamenkovic, V., Jovanovic, M., Andjus, P.R., Jakovcevski, I., Schachner, M.,  
663 and Miljkovic, D. (2017). Tenascin-C deficiency protects mice from experimental  
664 autoimmune encephalomyelitis. *J Neuroimmunol* 302, 1-6.
- 665 Nadal-Nicolas, F.M., Jimenez-Lopez, M., Sobrado-Calvo, P., Nieto-Lopez, L., Canovas-  
666 Martinez, I., Salinas-Navarro, M., Vidal-Sanz, M., and Agudo, M. (2009). Brn3a as a  
667 marker of retinal ganglion cells: qualitative and quantitative time course studies in naive  
668 and optic nerve-injured retinas. *Invest Ophthalmol Vis Sci* 50, 3860-3868.
- 669 Nakazawa, T., Nakazawa, C., Matsubara, A., Noda, K., Hisatomi, T., She, H., Michaud, N.,  
670 Hafezi-Moghadam, A., Miller, J.W., and Benowitz, L.I. (2006). Tumor necrosis factor-  
671 alpha mediates oligodendrocyte death and delayed retinal ganglion cell loss in a mouse  
672 model of glaucoma. *J Neurosci* 26, 12633-12641.
- 673 Noristani, R., Kuehn, S., Stute, G., Reinehr, S., Stellbogen, M., Dick, H.B., and Joachim, S.C.  
674 (2016). Retinal and Optic Nerve Damage is Associated with Early Glial Responses in an  
675 Experimental Autoimmune Glaucoma Model. *J Mol Neurosci* 58, 470-482.
- 676 Pena, J.D., Varela, H.J., Ricard, C.S., and Hernandez, M.R. (1999). Enhanced tenascin expression  
677 associated with reactive astrocytes in human optic nerve heads with primary open angle  
678 glaucoma. *Exp Eye Res* 68, 29-40.
- 679 Pfaffl, M.W., Horgan, G.W., and Dempfle, L. (2002). Relative expression software tool (REST)  
680 for group-wise comparison and statistical analysis of relative expression results in real-  
681 time PCR. *Nucleic Acids Res* 30, e36.
- 682 Piccinini, A.M., and Midwood, K.S. (2012). Endogenous control of immunity against infection:  
683 tenascin-C regulates TLR4-mediated inflammation via microRNA-155. *Cell Rep* 2, 914-  
684 926.
- 685 Piras, F., Salani, F., Bossu, P., Caltagirone, C., and Spalletta, G. (2012). High serum levels of  
686 transforming growth factor beta1 are associated with increased cortical thickness in  
687 cingulate and right frontal areas in healthy subjects. *J Neuroinflammation* 9, 42.
- 688 Pohl, H.B., Porcheri, C., Mueggler, T., Bachmann, L.C., Martino, G., Riethmacher, D., Franklin,  
689 R.J., Rudin, M., and Suter, U. (2011). Genetically induced adult oligodendrocyte cell  
690 death is associated with poor myelin clearance, reduced remyelination, and axonal  
691 damage. *J Neurosci* 31, 1069-1080.
- 692 Ramirez, A.I., De Hoz, R., Salobar-Garcia, E., Salazar, J.J., Rojas, B., Ajoy, D., Lopez-Cuenca,  
693 I., Rojas, P., Trivino, A., and Ramirez, J.M. (2017). The Role of Microglia in Retinal  
694 Neurodegeneration: Alzheimer's Disease, Parkinson, and Glaucoma. *Front Aging*  
695 *Neurosci* 9, 214.
- 696 Reinehr, S., Kuehn, S., Casola, C., Koch, D., Stute, G., Grotegut, P., Dick, H.B., and Joachim,  
697 S.C. (2018). HSP27 immunization reinforces AII amacrine cell and synapse damage  
698 induced by S100 in an autoimmune glaucoma model. *Cell Tissue Res* 371, 237-249.
- 699 Reinehr, S., Reinhard, J., Wiemann, S., Hesse, K., Voss, C., Gandej, M., Dick, H.B., Faissner, A.,  
700 and Joachim, S.C. (2019). Transfer of the Experimental Autoimmune Glaucoma Model  
701 from Rats to Mice-New Options to Study Glaucoma Disease. *Int J Mol Sci* 20.
- 702 Reinehr, S., Reinhard, J., Wiemann, S., Stute, G., Kuehn, S., Woestmann, J., Dick, H.B., Faissner,  
703 A., and Joachim, S.C. (2016). Early remodelling of the extracellular matrix proteins  
704 tenascin-C and phosphacan in retina and optic nerve of an experimental autoimmune  
705 glaucoma model. *J Cell Mol Med* 20, 2122-2137.

- 706 Reinhard, J., Joachim, S.C., and Faissner, A. (2015). Extracellular matrix remodeling during  
707 retinal development. *Exp Eye Res* 133, 132-140.
- 708 Reinhard, J., Renner, M., Wiemann, S., Shakoor, D.A., Stute, G., Dick, H.B., Faissner, A., and  
709 Joachim, S.C. (2017a). Ischemic injury leads to extracellular matrix alterations in retina  
710 and optic nerve. *Sci Rep* 7, 43470.
- 711 Reinhard, J., Roll, L., and Faissner, A. (2017b). Tenascins in Retinal and Optic Nerve  
712 Neurodegeneration. *Front Integr Neurosci* 11, 30.
- 713 Reinhard, J., Wiemann, S., Joachim, S.C., Palmhof, M., Woestmann, J., Denecke, B., Wang, Y.,  
714 Downey, G.P., and Faissner, A. (2019). Heterozygous *Meg2* Ablation Causes Intraocular  
715 Pressure Elevation and Progressive Glaucomatous Neurodegeneration. *Mol Neurobiol* 56,  
716 4322-4345.
- 717 Roll, L., and Faissner, A. (2019). Tenascins in CNS lesions. *Semin Cell Dev Biol* 89, 118-124.
- 718 Schmid, H., Renner, M., Dick, H.B., and Joachim, S.C. (2014). Loss of inner retinal neurons after  
719 retinal ischemia in rats. *Invest Ophthalmol Vis Sci* 55, 2777-2787.
- 720 Senatorov, V., Malyukova, I., Fariss, R., Wawrousek, E.F., Swaminathan, S., Sharan, S.K., and  
721 Tomarev, S. (2006). Expression of mutated mouse myocilin induces open-angle glaucoma  
722 in transgenic mice. *J Neurosci* 26, 11903-11914.
- 723 Shon, K., Wollstein, G., Schuman, J.S., and Sung, K.R. (2014). Prediction of glaucomatous visual  
724 field progression: pointwise analysis. *Curr Eye Res* 39, 705-710.
- 725 Silverman, S.M., and Wong, W.T. (2018). Microglia in the Retina: Roles in Development,  
726 Maturity, and Disease. *Annu Rev Vis Sci* 4, 45-77.
- 727 Smith, G.M., and Hale, J.H. (1997). Macrophage/Microglia regulation of astrocytic tenascin:  
728 synergistic action of transforming growth factor-beta and basic fibroblast growth factor. *J*  
729 *Neurosci* 17, 9624-9633.
- 730 Tang, Y., and Le, W. (2016). Differential Roles of M1 and M2 Microglia in Neurodegenerative  
731 Diseases. *Mol Neurobiol* 53, 1181-1194.
- 732 Tezel, G., Edward, D.P., and Wax, M.B. (1999). Serum autoantibodies to optic nerve head  
733 glycosaminoglycans in patients with glaucoma. *Arch Ophthalmol* 117, 917-924.
- 734 Tezel, G., Li, L.Y., Patil, R.V., and Wax, M.B. (2001). TNF-alpha and TNF-alpha receptor-1 in  
735 the retina of normal and glaucomatous eyes. *Invest Ophthalmol Vis Sci* 42, 1787-1794.
- 736 Tezel, G., Seigel, G.M., and Wax, M.B. (1998). Autoantibodies to small heat shock proteins in  
737 glaucoma. *Invest Ophthalmol Vis Sci* 39, 2277-2287.
- 738 Theocharidis, U., Long, K., Ffrench-Constant, C., and Faissner, A. (2014). Regulation of the  
739 neural stem cell compartment by extracellular matrix constituents. *Prog Brain Res* 214, 3-  
740 28.
- 741 Theocharis, A.D., Manou, D., and Karamanos, N.K. (2019). The extracellular matrix as a  
742 multitasking player in disease. *FEBS J* 286, 2830-2869.
- 743 Tochel, C.M., Morton, J.S., Jay, J.L., and Morrison, J.D. (2005). Relationship between visual  
744 field loss and contrast threshold elevation in glaucoma. *BMC Ophthalmol* 5, 22.
- 745 Varnum, M.M., and Ikezu, T. (2012). The classification of microglial activation phenotypes on  
746 neurodegeneration and regeneration in Alzheimer's disease brain. *Arch Immunol Ther Exp*  
747 (*Warsz*) 60, 251-266.
- 748 Wax, M.B. (2011). The case for autoimmunity in glaucoma. *Exp Eye Res* 93, 187-190.
- 749 Wax, M.B., Tezel, G., and Edward, P.D. (1998). Clinical and ocular histopathological findings in  
750 a patient with normal-pressure glaucoma. *Arch Ophthalmol* 116, 993-1001.
- 751 Wax, M.B., Yang, J., and Tezel, G. (2001). Serum autoantibodies in patients with glaucoma. *J*  
752 *Glaucoma* 10, S22-24.
- 753 Wiemann, S., Reinhard, J., and Faissner, A. (2019). Immunomodulatory role of the extracellular  
754 matrix protein tenascin-C in neuroinflammation. *Biochem Soc Trans* 47, 1651-1660.
- 755 Williams, P.A., Marsh-Armstrong, N., Howell, G.R., Lasker, I.I.O.A., and Glaucomatous  
756 Neurodegeneration, P. (2017). Neuroinflammation in glaucoma: A new opportunity. *Exp*  
757 *Eye Res* 157, 20-27.

- 758 Wolf, S.A., Boddeke, H.W., and Kettenmann, H. (2017). Microglia in Physiology and Disease.  
759 *Annu Rev Physiol* 79, 619-643.
- 760 Xiang, M., Zhou, H., and Nathans, J. (1996). Molecular biology of retinal ganglion cells. *Proc*  
761 *Natl Acad Sci U S A* 93, 596-601.

## 762 13 Figure legends

763 **Figure 1:** IOP and ERG recordings were not altered after immunization of WT and KO mice.  
764 (A) IOP measurements were performed before immunization in WT and KO at 5 weeks of age (-  
765 1; n = 16/group). Then, IOP was determined weekly in immunized and control WT and KO until  
766 the end of the study (n = 8/group). No significant changes could be detected between all groups (n  
767 = 5/group). (B, C) ERG recordings 10 weeks after initial immunization in control and immunized  
768 WT and KO mice. No changes in a-wave (B) and b-wave (C) amplitudes could be detected in  
769 control and immunized WT and KO mice. Data were analyzed using one-way ANOVA followed  
770 by Tukey's post hoc test and present as means  $\pm$  SEM  $\pm$  SD in (A) and mean  $\pm$  SEM in (B, C).  
771 cd: candela; IOP: intraocular pressure;  $\mu$ V: micro volt; m: minutes; s: seconds.

772  
773 **Figure 2:** Lower RGC loss in immunized KO animals.  
774 (A) Retinal cross-sections from WT CO, WT ONA, KO CO, and KO ONA mice were stained  
775 with an antibody against Brn3a (red), and nuclei were detected with TO-PRO-3 (blue). (B) A  
776 decline of RGC density was detected in WT ONA compared to the control groups (n = 5/group).  
777 (C) Representative pictures of Brn3a<sup>+</sup> cells in retinal flat-mounts. (D-F) Quantification of the  
778 total RGC number as well as in central and peripheral parts (n = 9/group). A significant loss of  
779 RGCs was detected in immunized WT and KO in comparison to the control groups. It was also  
780 shown that the RGC number in KO ONA RGCs were significantly decreased compared to WT  
781 CO. Furthermore, WT ONA RGC number were significantly reduced compared to KO CO. Data  
782 were analyzed using one-way ANOVA followed by Tukey's post hoc test and values were shown  
783 as mean  $\pm$  SEM. \*p < 0.05; \*\*p < 0.01; \*\*\*p < 0.001. Scale bar = 20  $\mu$ m in (A) and 50  $\mu$ m in (C).  
784 ONL: outer nuclear layer; OPL: outer plexiform layer; INL: inner nuclear layer; IPL: inner  
785 plexiform layer; GCL: ganglion cell layer.

786  
787 **Figure 3:** No optic nerve degeneration in KO post immunization.  
788 (A) Optic nerve slices were stained with  $\beta$ III-tubulin (green) and cell nuclei were marked with  
789 TO-PRO-3 (blue). (B) WT ONA mice showed a significantly decreased  $\beta$ III-tubulin<sup>+</sup> area  
790 compared to WT CO as well as to KO ONA group. Data were analyzed using one-way ANOVA  
791 followed by Tukey's post hoc test and present as means  $\pm$  SEM. \*p < 0.05; \*\*p < 0.01. n =  
792 4/group. Scale bar = 20  $\mu$ m.

793  
794 **Figure 4:** Reduced astrogliosis after immunization in KO mice.  
795 (A) Images of GFAP stained macroglia cells in retinal cross-section from control and immunized  
796 WT and KO animals. Immunohistochemistry revealed a prominent signal for GFAP<sup>+</sup> cells (green)  
797 in the GCL and NFL. Cell nuclei were detected with TO-PRO-3 (blue). (B) GFAP<sup>+</sup> area was  
798 significantly increased in WT ONA compared to WT CO. No changes of the GFAP signal area  
799 was found in KO ONA compared to the control groups. (C) Western blot analyses of GFAP  
800 protein in retinal tissue. (D) Quantification revealed more GFAP in WT ONA, whereas a  
801 comparable level was observed in KO ONA. (E) No differences of *Gfap* expression were noted in  
802 KO CO compared to WT CO. (F) A significant upregulation of *Gfap* mRNA expression was seen  
803 in WT ONA in comparison to WT CO. (G) WT ONA and KO ONA animals showed similar *Gfap*  
804 levels. Data were analyzed using one-way ANOVA followed by Tukey's post hoc test and  
805 present as means  $\pm$  SEM in (B, D). For RT-qPCR results, groups were compared using the  
806 pairwise fixed reallocation and randomization test and were shown as median  $\pm$  quartile  $\pm$   
807 minimum/maximum in (E-G). \*p < 0.05. n = 5/group. Scale bar = 20  $\mu$ m. ONL: outer nuclear  
808 layer, OPL: outer plexiform layer, INL: inner nuclear layer, IPL: inner plexiform layer, GCL:  
809 ganglion cell layer.

810  
811

812 **Figure 5:** Diminished macroglial response post ONA-immunization in optic nerve tissue of KO  
813 animals.

814 (A) Representative pictures of optic nerve sections of control and immunized WT and KO mice  
815 stained against GFAP (green). Nuclear staining was done with TO-PRO-3 (blue). (B) WT ONA  
816 animals showed a larger GFAP<sup>+</sup> staining area than WT CO. No differences between KO mice  
817 could be detected. (C) Western blot analyses of relative GFAP protein levels in optic nerve tissue.  
818 (D) Protein quantification revealed slightly enhanced band intensity in WT ONA, whereas KO  
819 ONA exhibit no increased GFAP level. (E) No differences of *Gfap* expression were noted in KO  
820 CO compared to WT CO. (F) A slight upregulation of *Gfap* mRNA expression was seen in WT  
821 ONA in comparison to WT CO, but in KO ONA decreased expression was verified compared to  
822 KO CO. (G) A downregulation of *Gfap* in KO ONA in comparison to WT ONA was noted. Data  
823 were analyzed using one-way ANOVA followed by Tukey's post hoc test and were shown as  
824 mean ± SEM in (B, D). For RT-qPCR, groups were compared using the pairwise fixed  
825 reallocation and randomization test and were shown as median ± quartile ± minimum/maximum  
826 in (E-G). \*p < 0.05. n = 5/group. Scale bar = 20 μm.

827

828 **Figure 6:** No demyelination after immunization in KO mice.

829 (A) Olig2 (red) and CC1 (green) staining of optic nerve sections. Cell nuclei were labeled with  
830 TO-PRO-3 (blue). (B) Quantification of Olig2<sup>+</sup> cells revealed a significant decrease of  
831 oligodendroglia in WT ONA compared to WT CO and KO CO. Interestingly, the statistical  
832 comparison of both immunized groups showed a significant loss of Olig2<sup>+</sup> cells in WT compared  
833 to KO mice. (C) WT ONA nerves displayed a significantly decrease of mature oligodendrocytes  
834 in comparison to both control groups. A significant higher amount of double positive  
835 oligodendrocytes was observed in KO ONA compared to WT ONA. (D) An exemplary Western  
836 blot of Olig2. (E) Relative protein quantification revealed a slightly enhanced band intensity of  
837 the Olig2 protein in WT ONA, whereas KO ONA nerves exhibited no reduction of the Olig2  
838 protein level. Data were analyzed using one-way ANOVA followed by Tukey's post hoc test and  
839 values were shown as mean ± SEM. \*p < 0.05; \*\*p < 0.01, \*\*\*p < 0.001. n = 5/group. Scale bar  
840 = 50 μm.

841

842 **Figure 7:** Unaltered MBP immunoreactivity post immunization in KO mice.

843 (A) MBP (green) was stained in optic nerve tissue. In blue TO-PRO-3 detected cell nuclei.  
844 Immunohistochemistry indicates a reduced MBP signal in WT ONA. (B) A significant  
845 downregulation of MBP was noted in WT ONA compared to WT CO. Furthermore, the MBP  
846 signal was significantly reduced in WT ONA compared to control as well as to immunized KO  
847 mice. (C) Western blot analyses of MBP of optic nerve tissue. (D) Comparable MBP protein  
848 levels were observed in all groups. Data were analyzed using one-way ANOVA followed by  
849 Tukey's post hoc test and values were indicated as mean ± SEM. \*p < 0.05; \*\*p < 0.01; \*\*\*p <  
850 0.001. n = 5/group. Scale bar = 20 μm.

851

852 **Figure 8:** Decreased microglia response after immunization in KO mice.

853 (A) Representative pictures of Iba1<sup>+</sup> cells (green) in retinal flat-mounts of immunized and non-  
854 immunized WT and KO mice. (B-D) Quantification of Iba1<sup>+</sup> microglia in control and immunized  
855 WT and KO animals in the total, central, and peripheral retina (n = 9/group). WT ONA group  
856 exhibited clearly more microglia. In contrast, KO ONA animals displayed fewer Iba1<sup>+</sup> cells. (E)  
857 RT-qPCR analyses (n = 5/group) of the relative *Iba1*, *Nos2*, and *Cd68* mRNA expression showed  
858 a significant increase of *Nos2* and *Cd68* in KO CO compared to WT CO retinae. No differences  
859 were observed for *Iba1* mRNA expression. (F) Compared to WT CO, a significant upregulation  
860 of *Iba1*, *Nos2*, and *Cd68* levels were found in WT ONA. No significant changes were detected  
861 regarding the expression levels of these markers in KO ONA compared to KO CO. (G) After  
862 immunization, a comparable mRNA-Level of *Iba1*, *Cd68*, and *Nos2* was detected in KO ONA  
863 compared to KO CO. Data were analyzed using one-way ANOVA followed by Tukey's post hoc

864 test and present as means  $\pm$  SEM in **(B-D)**. Groups were compared using the pairwise fixed  
865 reallocation and randomization test and were shown as median  $\pm$  quartile  $\pm$  minimum/maximum  
866 for mRNA analysis in **(E-G)**. \* $p < 0.05$ ; \*\* $p < 0.01$ ; \*\*\* $p < 0.001$ . Scale bar = 50  $\mu\text{m}$ .

867  
868 **Figure 9:** Reduced pro-inflammatory and enhanced anti-inflammatory cytokine expression in  
869 immunized KO mice.

870 Relative expression of pro-inflammatory *Tnfa* and anti-inflammatory cytokine *Tgfb* was examined  
871 via RT-qPCR in control and immunized WT and KO retinae **(A-C)** and optic nerve tissue **(D-F)**.  
872 **(A)** Analysis revealed comparable levels of *Tnfa* and *Tgfb* in KO CO compared to WT CO. **(B)**  
873 *Tnfa* expression level was significantly increased in WT ONA compared to WT CO. Strikingly, a  
874 reduced *Tnfa* mRNA level was found in KO ONA compared to the corresponding control group.  
875 Regarding *Tgfb*, the expression was comparable in both genotypes. **(C)** Comparison of WT ONA  
876 und KO ONA. Here, the pro-inflammatory factor was downregulated, and the anti-inflammatory  
877 cytokine was significantly upregulated in KO mice after immunization. **(D-F)** Similar expression  
878 patterns of both examined cytokines in optic nerve tissue. A significantly enhanced *Tnfa*  
879 expression could be detected in WT ONA compared to WT CO **(E)**. Values were shown as  
880 median  $\pm$  quartile  $\pm$  maximum/minimum. \* $p < 0.05$ ; \*\* $p < 0.01$ .  $n = 5/\text{group}$ .

881 **14 Tables**

882 **Table 1:** List of primary and secondary antibodies to examine RGCs, macro- and microglial cell  
 883 types in retinæ and optic nerves via immunohistochemistry. Primary and secondary antibodies,  
 884 including species, clonality/type, dilution and source/stock number/RRID were shown.

| Primary Antibody                     | Species, Clonality/Type        | Dilution | Source (Stock no.)/RRID                     | Secondary Antibody    | Species, Type  | Dilution/Source   |
|--------------------------------------|--------------------------------|----------|---------------------------------------------|-----------------------|----------------|-------------------|
| Brn-3a<br>(Flat-mount/<br>Retina)    | Goat,<br>polyclonal,<br>IgG    | 1:300    | Santa Cruz<br>(Sc-31984)<br>RRID:AB_2167511 | Anti-goat<br>Cy3      | Donkey,<br>IgG | 1:250/<br>Dianova |
| CC1<br>(Optic nerve)                 | Mouse,<br>monoclonal,<br>IgG   | 1:100    | Abcam<br>(Ab16794)<br>RRID:AB_443473        | Anti-<br>mouse<br>Cy2 | Goat,<br>IgG   | 1:250/<br>Dianova |
| GFAP<br>(Retina/Optic<br>nerve)      | Mouse,<br>monoclonal,<br>IgG   | 1:300    | Sigma-Aldrich<br>(G3893)<br>RRID:AB_477010  | Anti-<br>mouse<br>Cy2 | Goat,<br>IgG   | 1:250/<br>Dianova |
| Iba1<br>(Flat-mount)                 | Rabbit,<br>polyclonal, IgG     | 1:250    | WAKO<br>(019-19741)<br>RRID:AB_839504       | Anti-rabbit<br>Cy2    | Donkey,<br>IgG | 1:250/<br>Dianova |
| MBP<br>(Optic nerve)                 | Rat,<br>monoclonal,<br>IgG     | 1:250    | Bio-Rad<br>(MCA409)<br>RRID:AB_325004       | Anti-rat<br>Cy2       | Goat,<br>IgG   | 1:250/<br>Dianova |
| Olig2<br>(Optic nerve)               | Rabbit,<br>polyclonal,<br>IgG  | 1:400    | Merck<br>(AB9610)<br>RRID:AB_570666         | Anti-rabbit<br>Cy3    | Goat,<br>IgG   | 1:250/<br>Dianova |
| $\beta$ III-tubulin<br>(Optic nerve) | Mouse,<br>monoclonal,<br>IgG2b | 1:300    | Sigma-Aldrich<br>(T 8660)<br>RRID:AB_477590 | Anti-<br>mouse<br>Cy2 | Goat,<br>IgG   | 1:250/<br>Dianova |

885

886

887 **Table 2:** Adjustments for the ImageJ macro.  
 888 Data of background subtractions and upper/lower thresholds were present to determine the  
 889 immunoreactive area [%].

| Protein             | Tissue      | Background Subtraction | Lower Threshold | Upper Threshold |
|---------------------|-------------|------------------------|-----------------|-----------------|
| $\beta$ III-tubulin | Optic nerve | 50                     | 29.45           | 82.18           |
| GFAP                | Retina      | 20                     | 25.0            | 76.54           |
|                     | Optic nerve | 50                     | 27.50           | 78.0            |
| MBP                 | Optic nerve | 50                     | 7.62            | 62.45           |

890

891

892

893 **Table 3:** List of primary and secondary antibodies for western blotting. Primary and secondary  
 894 antibodies, including species, clonality, type, dilution, source and stock number/RRID are listed.  
 895 Relative quantification of band intensity was done against the housekeeping proteins  $\beta$ -Actin or  
 896 vinculin. HRP = horseradish peroxidase, kDa = Kilodalton.

| Primary Antibody | Species, Clonality, Type | Dilution | Source (Stock no.)/RRID                  | Secondary Antibody, Species, Type | Dilution/Source    | kDa       |
|------------------|--------------------------|----------|------------------------------------------|-----------------------------------|--------------------|-----------|
| $\beta$ -Actin   | Mouse, monoclonal, IgG   | 1:5000   | BD Bioscience (612657)<br>RRID:AB_399901 | Anti-mouse, IgG + IgM HRP         | 1:5000/<br>Dianova | 42        |
| GFAP             | Rabbit, polyclonal, IgG  | 1:10000  | Dako (Z0334)<br>RRID:AB_10013382         | Anti-rabbit, IgG HRP              | 1:5000/<br>Dianova | 50        |
| MBP              | Rat, monoclonal, IgG     | 1:1000   | Bio-Rad (MCA409)<br>RRID:AB_325004       | Anti-rat, IgG HRP                 | 1:5000/<br>Dianova | 20        |
| Olig2            | Rabbit, polyclonal, IgG  | 1:500    | Merck (AB9610)<br>RRID:AB_570666         | Anti-rabbit, IgG HRP              | 1:5000/<br>Dianova | 32 and 50 |
| vinculin         | Mouse, monoclonal, IgG1  | 1:200    | Sigma-Aldrich (V 9131)<br>RRID:AB_477629 | Anti-mouse, IgG + IgM HRP         | 1:5000/<br>Dianova | 116       |

897

898

899

900

901

902

903

904

905

906

907

908

909



910 **Table 4:** List of primer pairs used for mRNA analyses by RTq-PCR. For evaluation of mRNA-  
 911 levels, *Actb* and *18S* served as housekeeping genes. Primer sequence, predicted amplicon size,  
 912 primer efficiency for retinae and optic nerves, and GenBank accession number are listed. bp =  
 913 base pairs, for = forward, rev = reverse.

| Gene            | Primer Sequence            | Amplicon Size (bp) | Primer Efficiency, Retina/Optic Nerve | GenBank Accession Number       |
|-----------------|----------------------------|--------------------|---------------------------------------|--------------------------------|
| <i>18S_for</i>  | GCAATTATTCCCCATGAA<br>CG   | 68                 | -/1                                   | NR_003278.3                    |
| <i>18S_rev</i>  | GGGACTTAATCAACGCAA<br>GC   |                    |                                       |                                |
| <i>Actb_for</i> | CTAAGGCCAACCGTGAAA<br>AG   | 104                | 0.84/-                                | NM_007393.3                    |
| <i>Actb_rev</i> | ACCAGAGGCATACAGGG<br>ACA   |                    |                                       |                                |
| <i>Cd68_for</i> | GGACCCACAACCTGTCAC<br>TCA  | 60                 | 0.89/1                                | NM_001291058.1                 |
| <i>Cd68_rev</i> | AATTGTGGCATTCCCATG<br>AC   |                    |                                       |                                |
| <i>Gfap_for</i> | ACAGACTTTCTCCAACCT<br>CCAG | 63                 | 0.84/1                                | NM_001131020                   |
| <i>Gfap_rev</i> | CCTTCTGACACGGATTTG<br>GT   |                    |                                       |                                |
| <i>Iba1_for</i> | GGATTTGCAGGGAGGAAA<br>AG   | 92                 | 0.80/0.91                             | NM_019467.3                    |
| <i>Iba1_rev</i> | TGGGATCATCGAGGAATT<br>G    |                    |                                       |                                |
| <i>Nos2_for</i> | CTTTGCCACGGACGAGAC         | 66                 | 1/0.70                                | NM_010927.3                    |
| <i>Nos2_rev</i> | TCATTGTACTCTGAGGGC<br>TGAC |                    |                                       |                                |
| <i>Tgfb_for</i> | TGGAGCAACATGTGGAAC<br>TC   | 73                 | 1/0.91                                | NM_011577.2                    |
| <i>Tgfb_rev</i> | GTCAGCAGCCGGTTACCA         |                    |                                       |                                |
| <i>Tnfa_for</i> | TCTTCTCATTCTGCTTGT<br>GG   | 101                | 1/0.97                                | NM_013693.3/<br>NM_001278601.1 |
| <i>Tnfa_rev</i> | GAGGCCATTTGGGAACCT<br>CT   |                    |                                       |                                |

914

915

916 **Figure 1:**

917

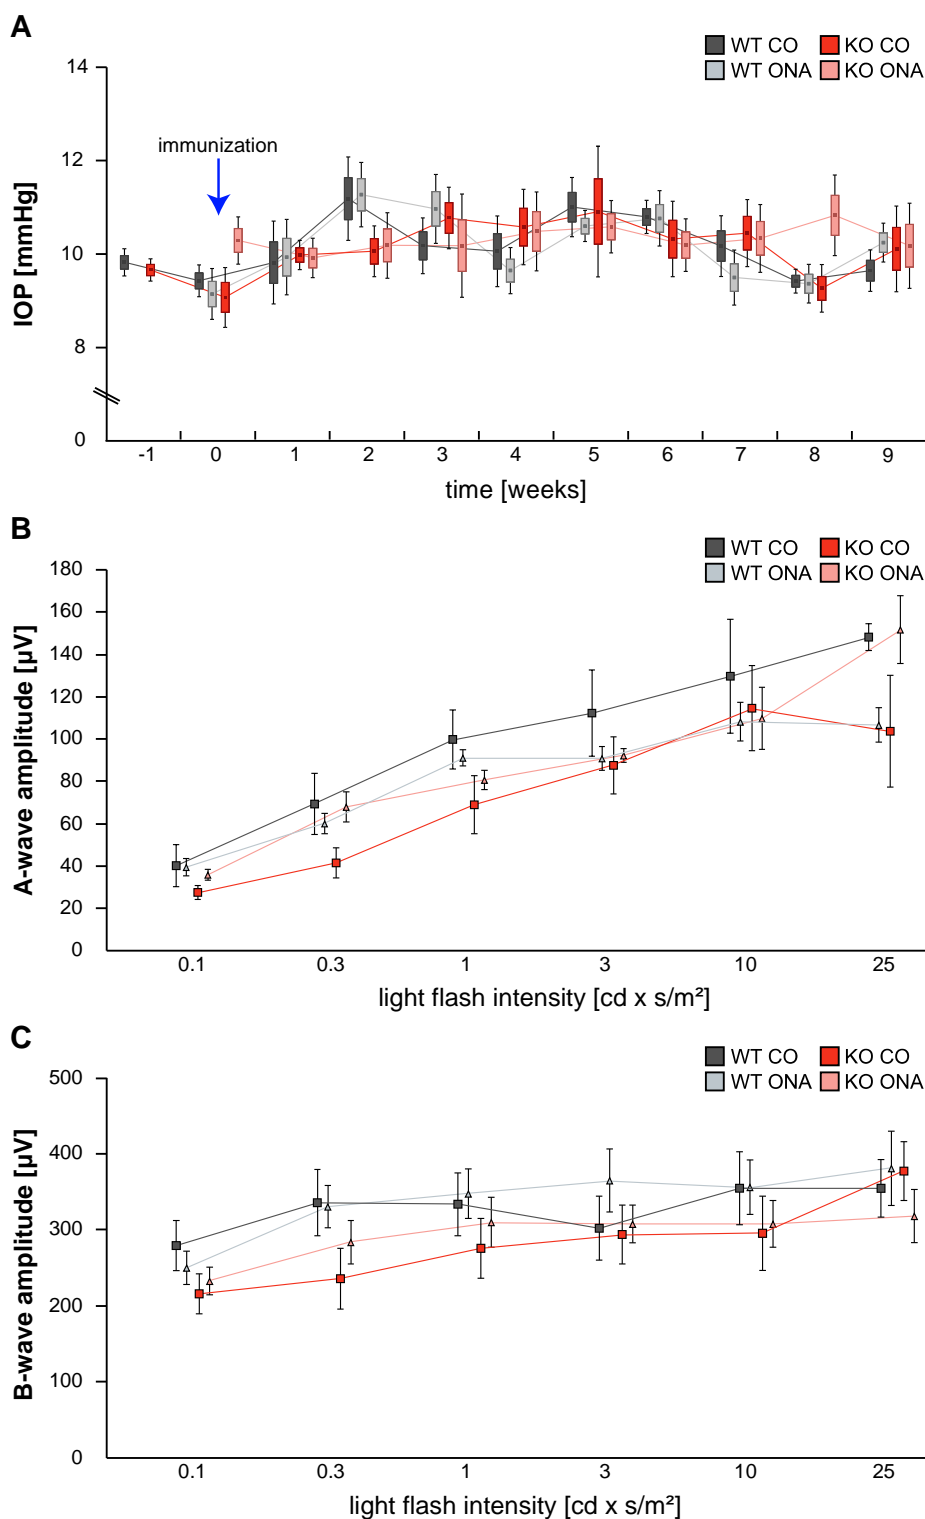

918

919

920 **Figure 2:**

921

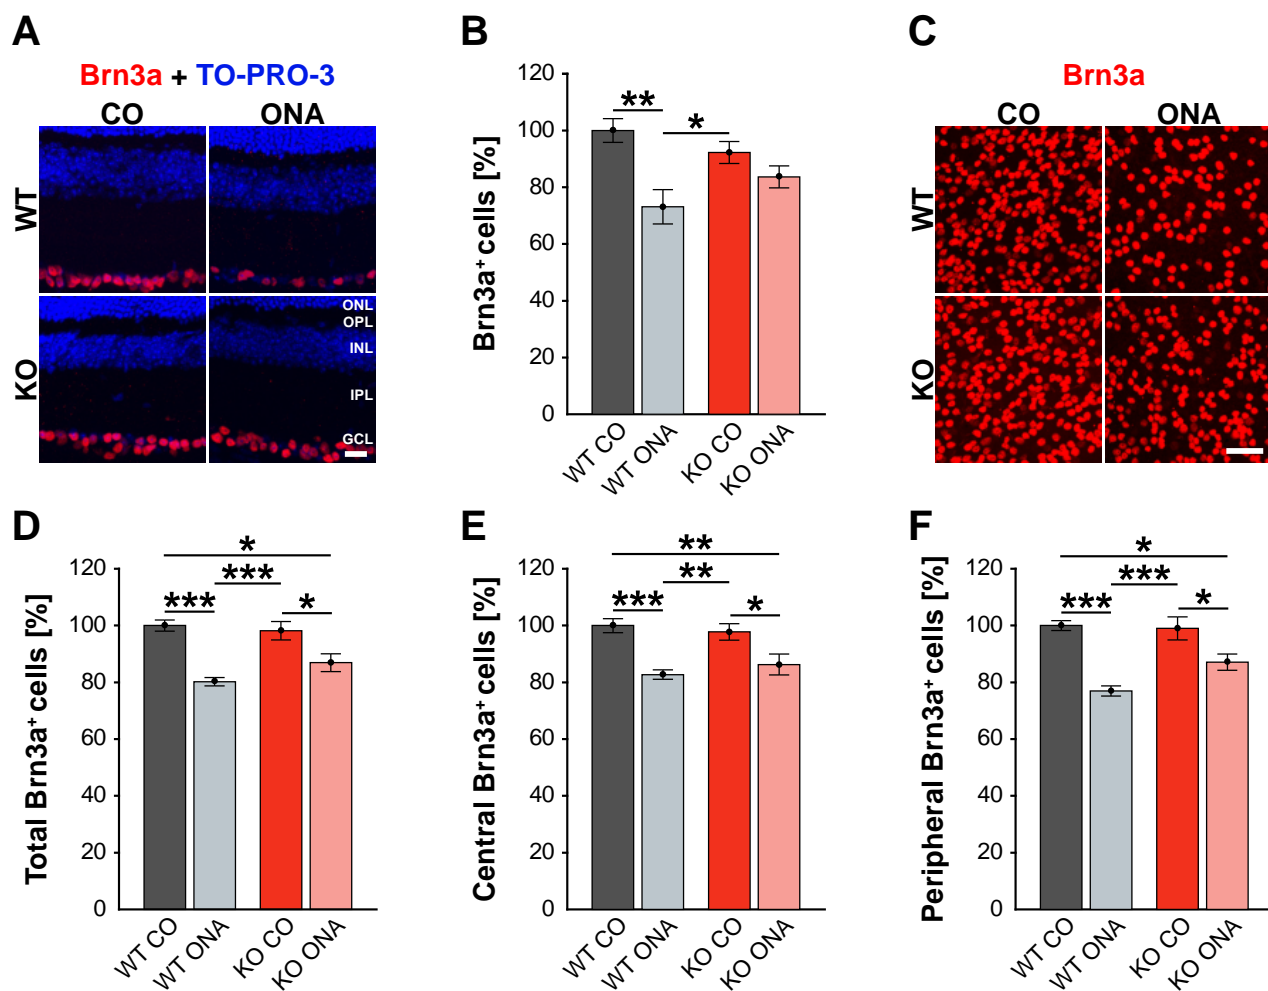

922

923

924 **Figure 3:**

925

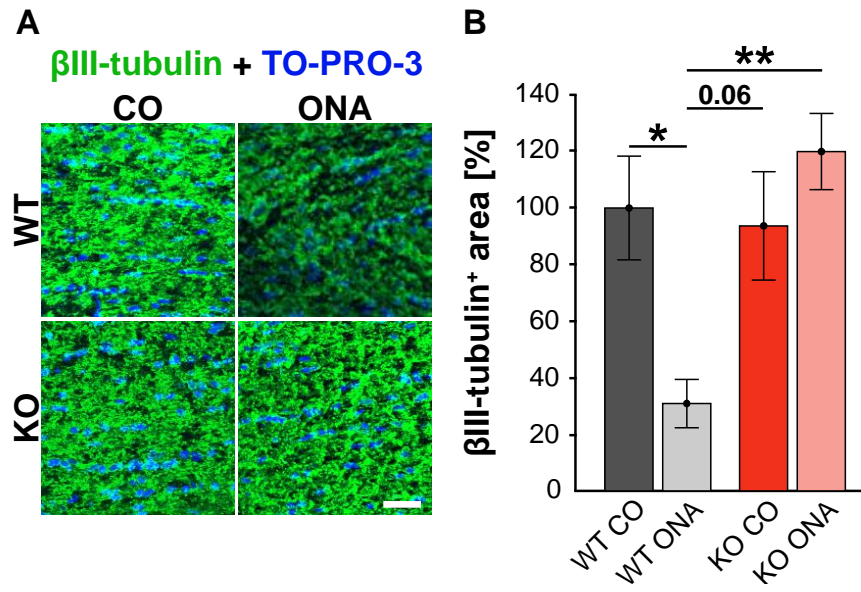

926

927

928 **Figure 4:**

929

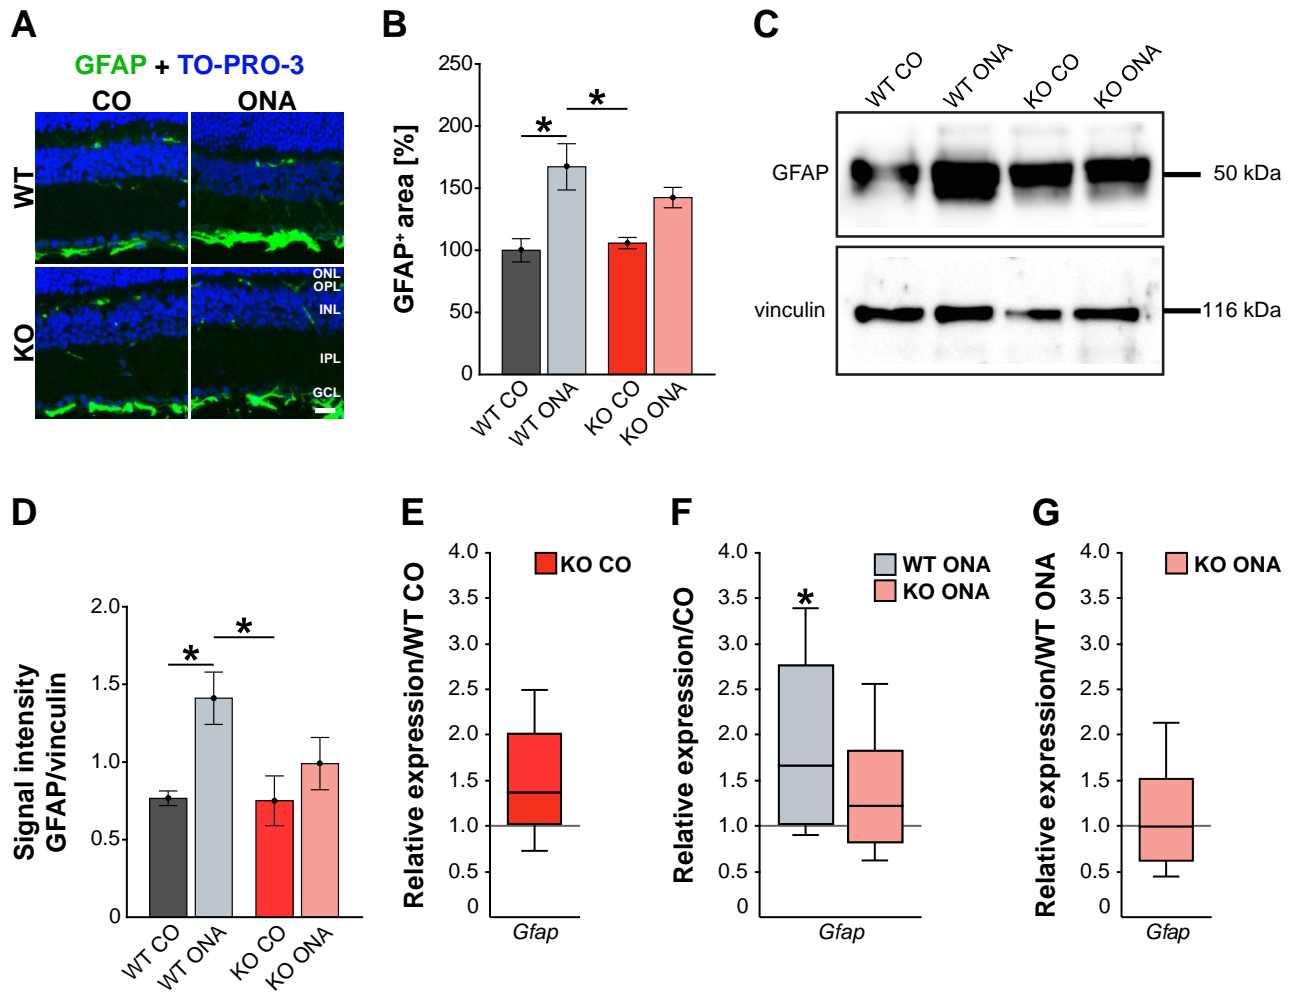

930

931

932 **Figure 5:**

933

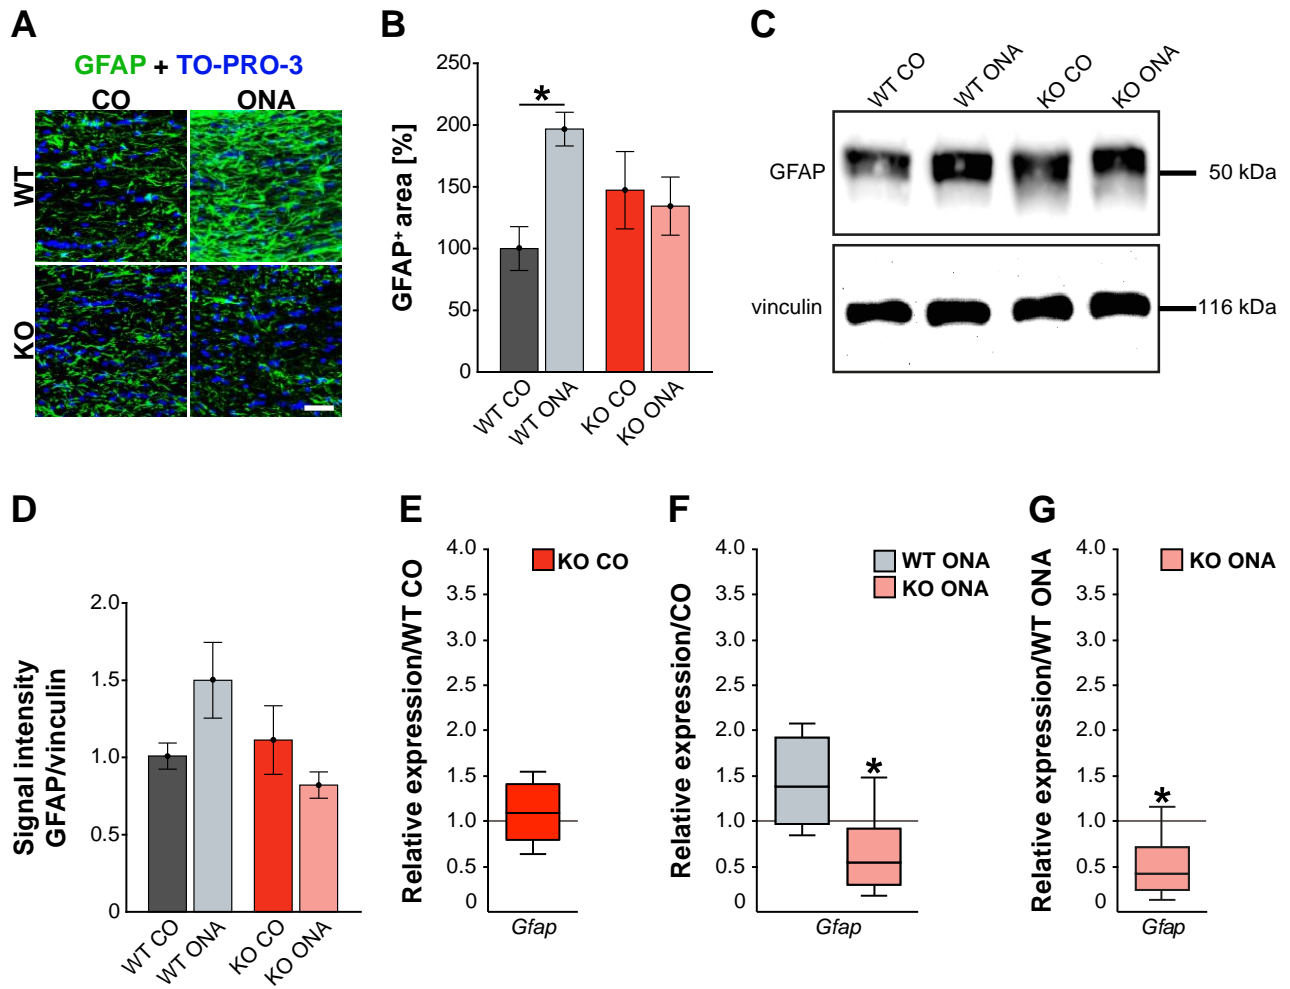

934

935

936 **Figure 6:**

937

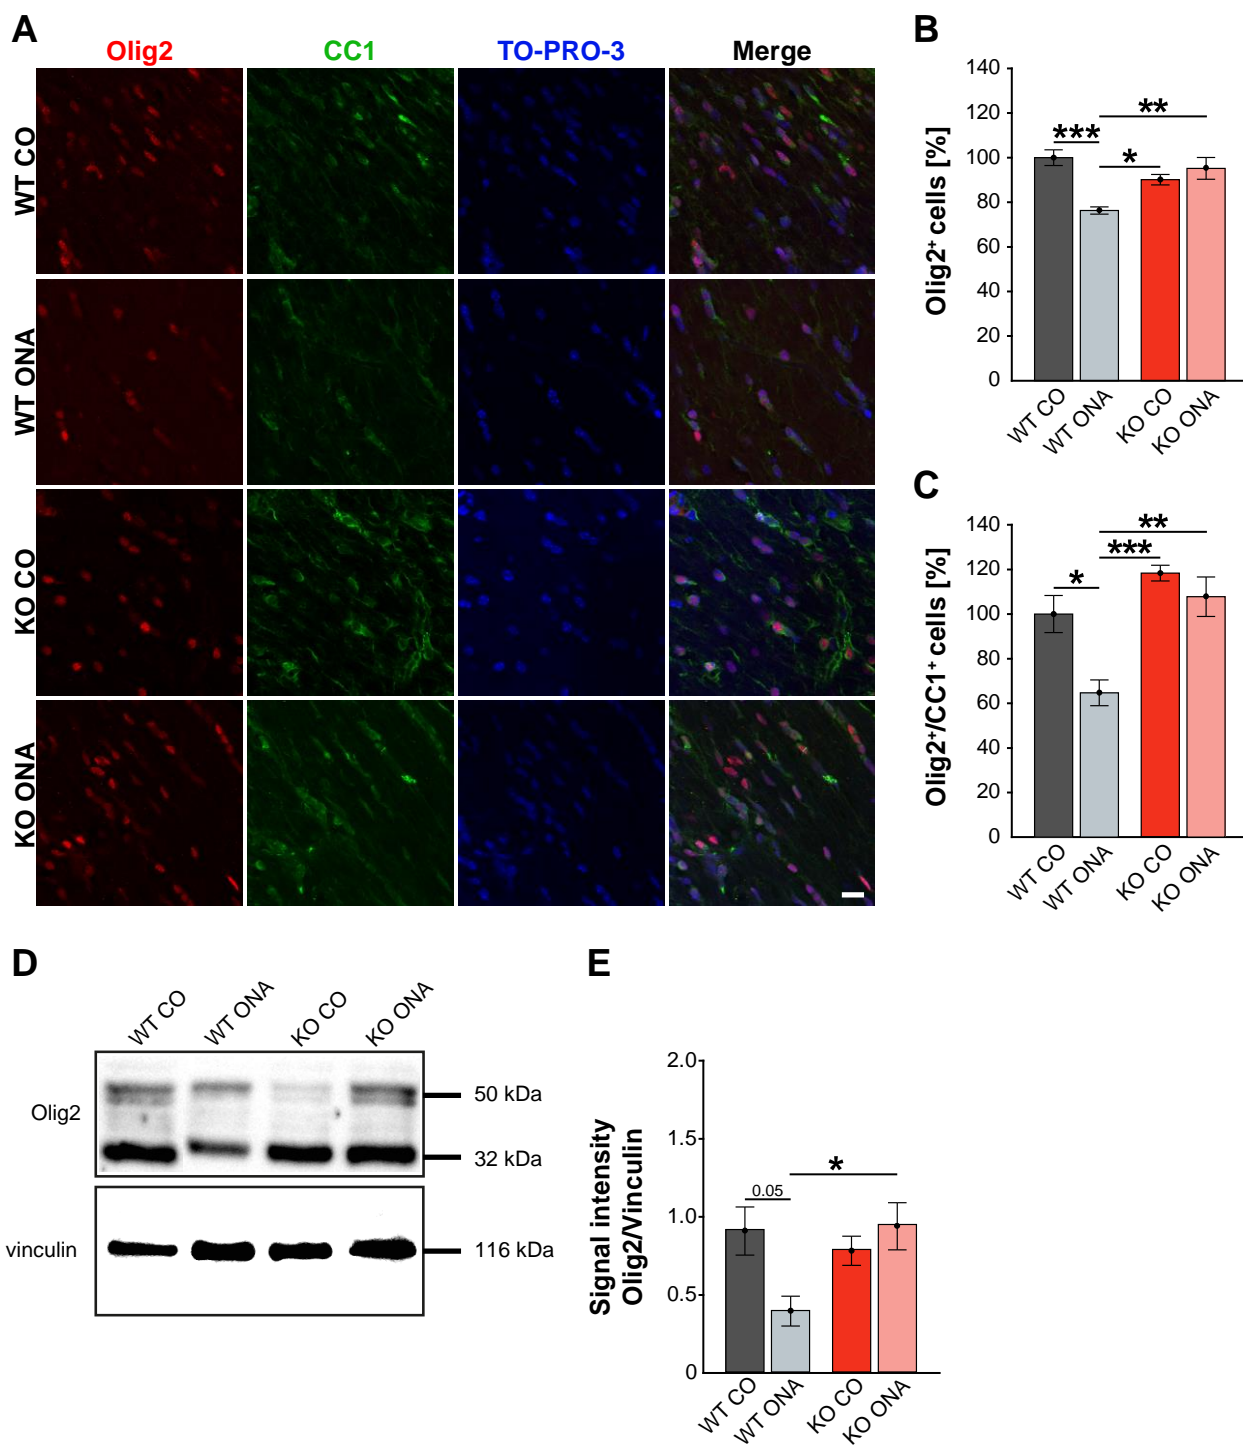

938

939

940 **Figure 7:**

941

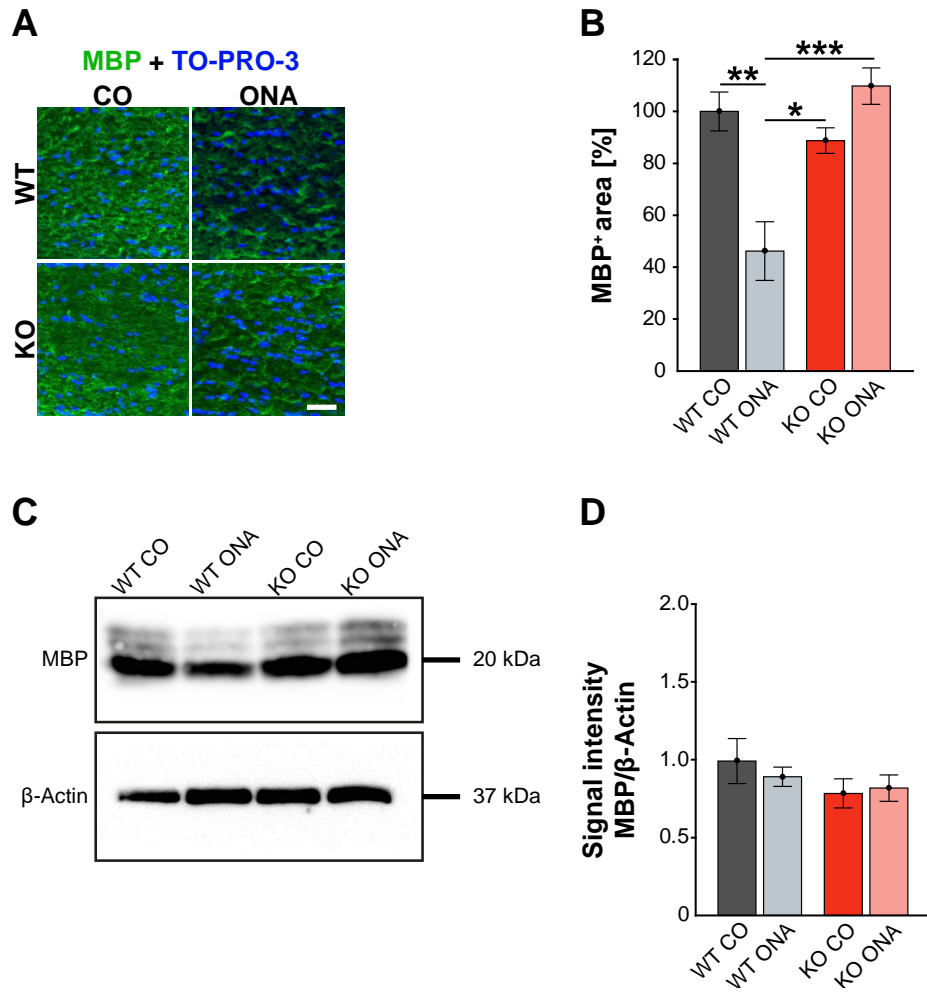

942

943

944



945 **Figure 8:**

946

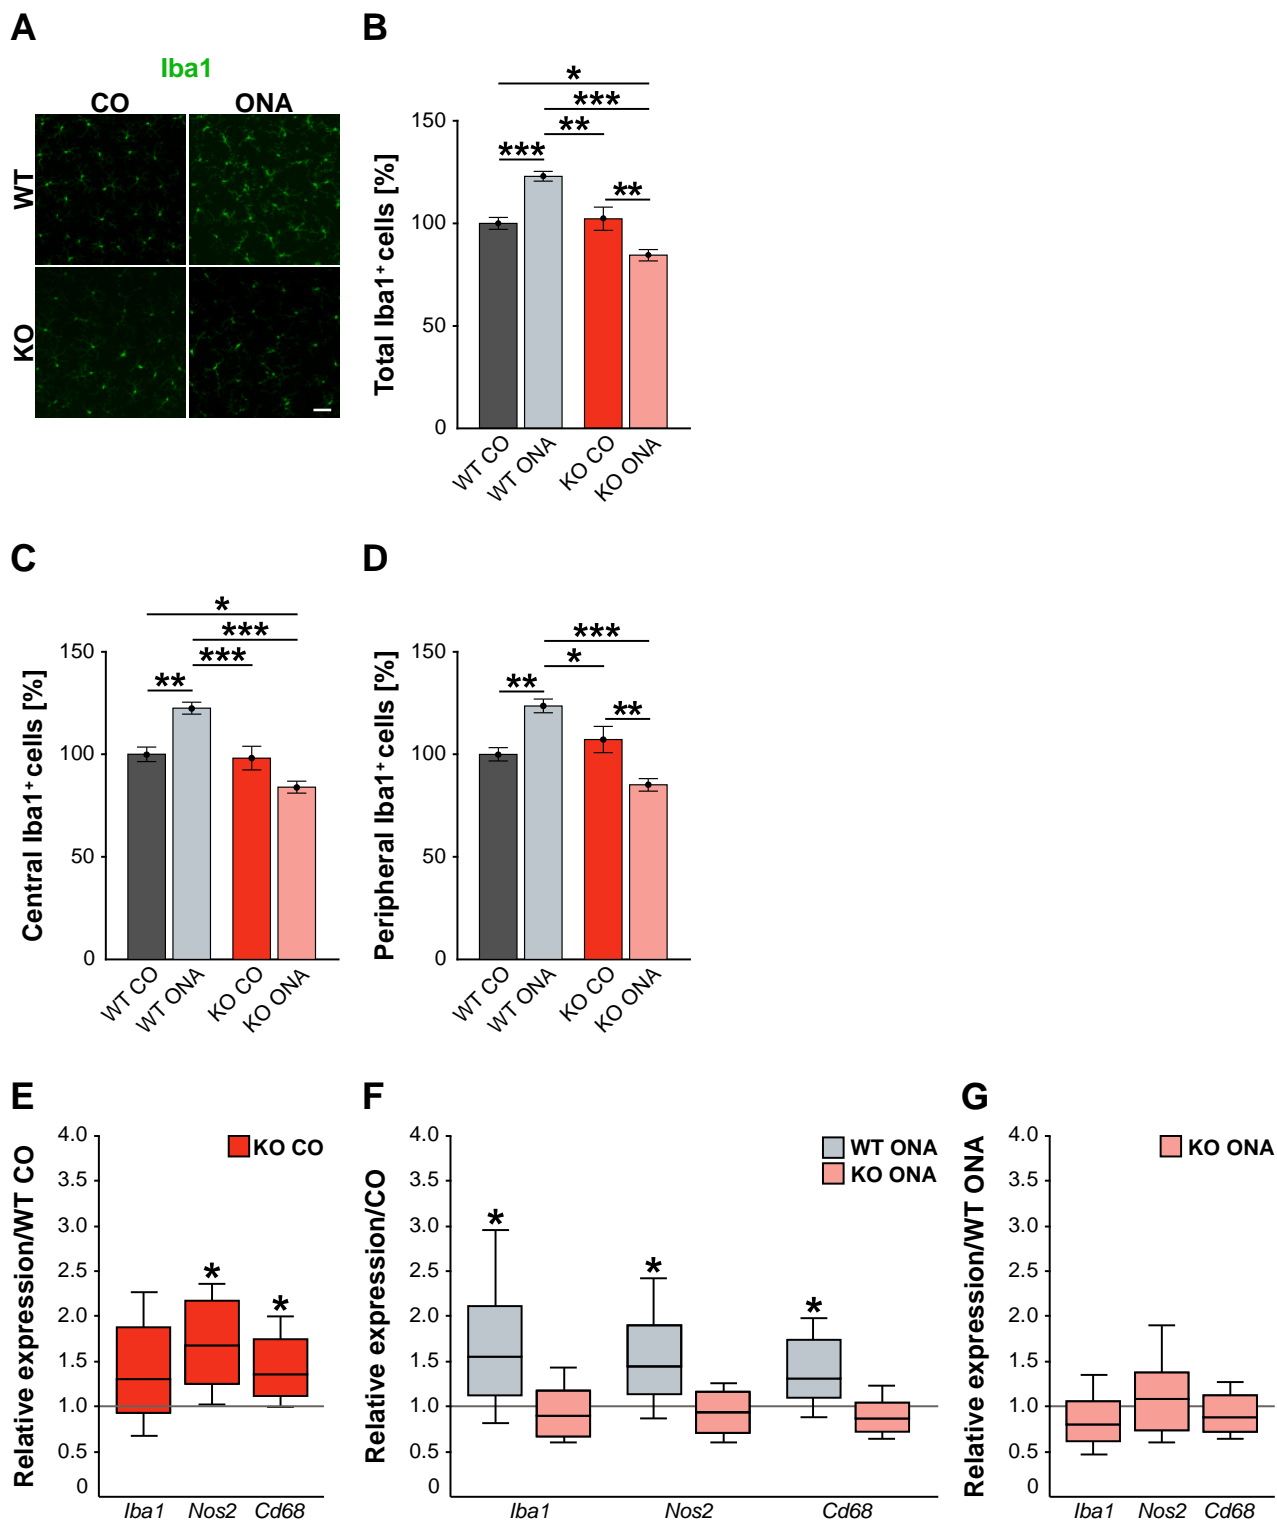

947

948

949

950 **Figure 9:**

951

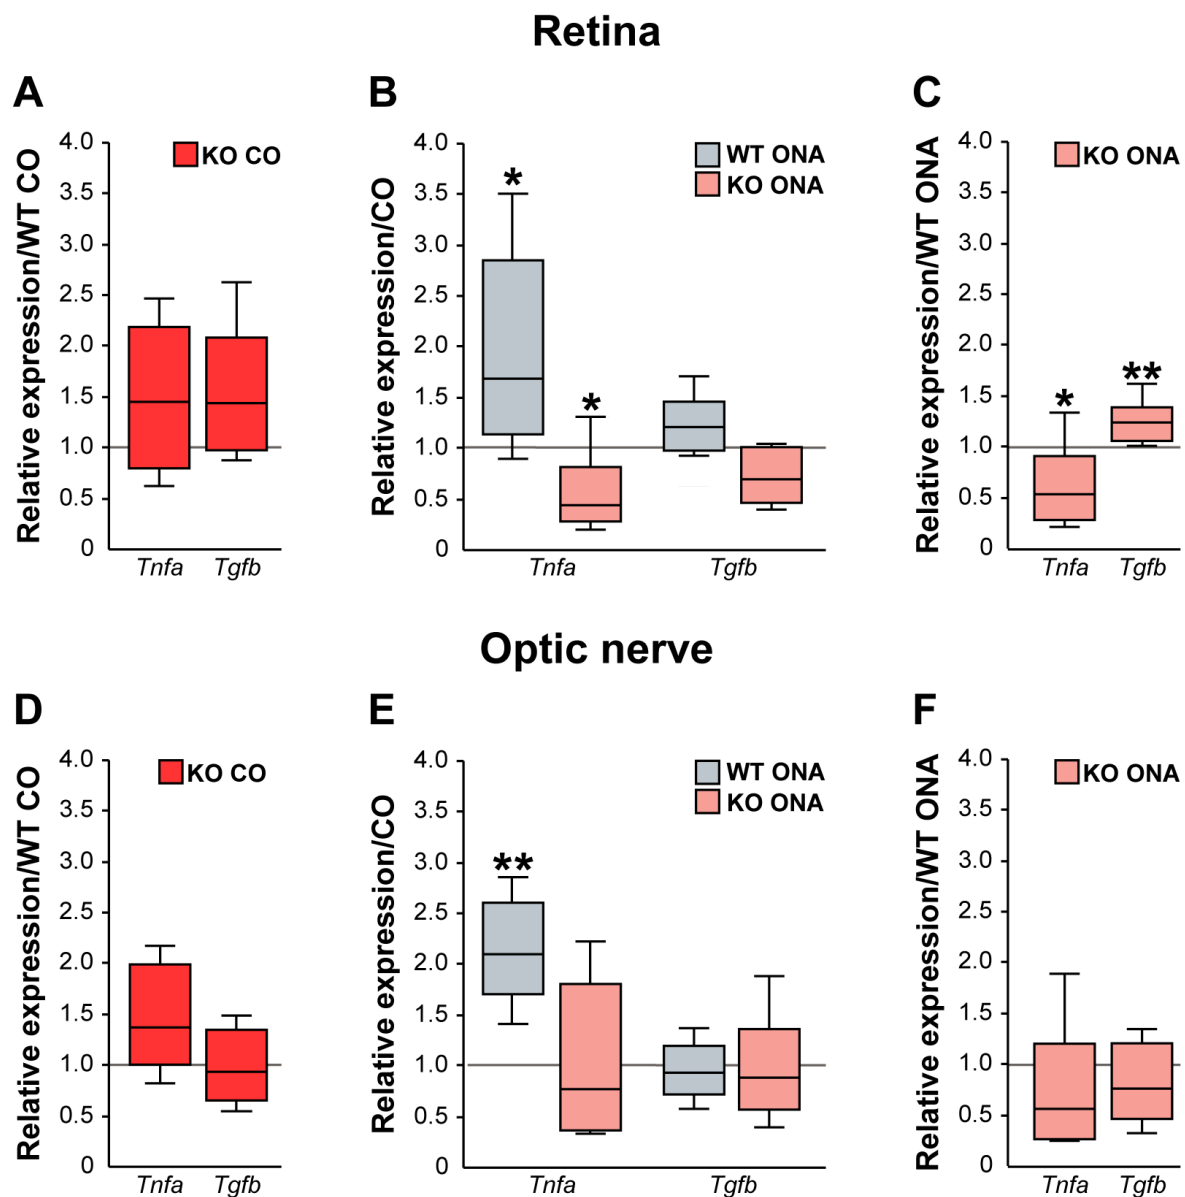

952

953

954

955
